# Supplementary material for: Sensory Changes and Listeria monocytogenes Behavior in Sliced Cured Pork Loins during Extended Storage
Source: MDPI journal article supplement (doi:10.3390/foods9050621), 2020-05-12
Supplement: s1 [file s1]

| code | storage<br>time | days | repetition | Count LAB | Count<br>Mould &<br>yeasts | Count<br>Listeria | pH   | aw   | L*    | a*    | b*   |
|------|-----------------|------|------------|-----------|----------------------------|-------------------|------|------|-------|-------|------|
| S0A  | 0               | 0    | 1          | 0.00      | 0.00                       | 3.13              | 5.81 | 0.94 | 52.25 | 20.14 | 6.52 |
| S0B  | 0               | 0    | 2          | 0.00      | 0.00                       | 3.20              | 5.80 | 0.94 | 54.69 | 19.30 | 6.14 |
| S0C  | 0               | 0    | 3          | 0.00      | 0.00                       | 3.30              | 5.79 | 0.93 | 56.80 | 23.08 | 6.70 |
| S2A  | 2               | 42   | 1          | 1.92      | 0.00                       | 2.52              | 5.24 |      | 51.61 | 19.59 | 6.67 |
| S2B  | 2               | 42   | 2          | 1.31      | 0.00                       | 2.25              | 5.23 |      | 51.57 | 19.33 | 6.20 |
| S2C  | 2               | 42   | 3          | 2.15      | 0.00                       | 2.38              | 5.23 |      | 55.66 | 24.70 | 6.69 |
| S3A  | 3               | 63   | 1          | 2.89      | 0.00                       | 2.07              | 5.16 |      | 50.62 | 21.53 | 6.71 |
| S3B  | 3               | 63   | 2          | 2.51      | 0.00                       | 2.29              | 5.18 |      | 50.98 | 21.21 | 6.99 |
| S3C  | 3               | 63   | 3          | 2.84      | 0.00                       | 2.19              | 5.17 |      | 49.81 | 21.67 | 6.59 |
| S4A  | 4               | 84   | 1          | 7.53      | 3.27                       | 2.19              | 4.98 |      | 45.56 | 21.68 | 5.70 |
| S4B  | 4               | 84   | 2          | 7.76      | 2.07                       | 2.14              | 5.01 |      | 43.56 | 21.69 | 5.78 |
| S4C  | 4               | 84   | 3          | 7.54      | 2.72                       | 2.29              | 4.98 |      | 46.02 | 24.82 | 6.49 |
| S6A  | 6               | 126  | 1          | 8.12      | 3.02                       | 1.66              | 4.95 |      | 39.50 | 22.58 | 5.57 |
| S6B  | 6               | 126  | 2          | 8.03      | 3.99                       | 1.83              | 5.00 |      | 41.35 | 24.52 | 6.69 |
| S6C  | 6               | 126  | 3          | 7.96      | 2.41                       | 1.35              | 5.02 |      | 42.62 | 21.35 | 7.05 |
