# Supplementary material for: Sensory Changes and Listeria monocytogenes Behavior in Sliced Cured Pork Loins during Extended Storage
Source: MDPI journal article supplement (doi:10.3390/foods9050621), 2020-05-12
Supplement: s1 [file s1]

|    | A        | B            | C           | D                         | E                                  | F                           | G                          | H            | I              | J     | K   | L      | M            | N              | O    | P            | Q              | R          | S            | T               | U           | V           | W      | X      | Y    | Z               | AA     | AB                 | AC         | AD      | AE          | AF         |
|----|----------|--------------|-------------|---------------------------|------------------------------------|-----------------------------|----------------------------|--------------|----------------|-------|-----|--------|--------------|----------------|------|--------------|----------------|------------|--------------|-----------------|-------------|-------------|--------|--------|------|-----------------|--------|--------------------|------------|---------|-------------|------------|
| 1  | Consumer | Gender OF 1M | Age (cont.) | Usual consumer 0 no 1 yes | Freshness 1 not fresh 5 very fresh | will to purchase 0 no 1 yes | will to consume 0 no 1 yes | storage time | Moisten aspect | Slime | Dry | Bright | Cured aspect | Brownish color | Dull | Darker spots | Greenish spots | Wine aroma | garlic aroma | Fermented aroma | Smoke aroma | Cured aroma | Rancid | Sulfur | Mold | Ammoniac/rotten | Butter | Sour/vinegar aroma | Salty tase | Piquant | Sweet taste | Acid taste |
| 22 | 21       | 0            | 23          | 1                         | 5                                  | 1                           | 1                          | 0            | 0              | 0     | 1   | 0      | 1            | 0              | 0    | 0            | 0              | 1          | 0            | 0               | 0           | 1           | 0      | 0      | 0    | 0               | 0      | 0                  | 0          | 0       | 0           | 0          |
| 23 | 22       | 0            | 28          | 1                         | 5                                  | 1                           | 1                          | 0            | 0              | 0     | 1   | 0      | 1            | 0              | 0    | 0            | 0              | 1          | 0            | 0               | 1           | 1           | 0      | 0      | 0    | 0               | 0      | 0                  | 0          | 0       | 0           | 0          |
| 24 | 23       | 1            | 23          | 1                         | 4                                  | 1                           | 1                          | 0            | 0              | 0     | 1   | 1      | 0            | 0              | 0    | 1            | 0              | 1          | 0            | 0               | 0           | 1           | 0      | 0      | 0    | 0               | 0      | 0                  | 1          | 0       | 0           | 0          |
| 25 | 24       | 1            | 39          | 1                         | 3                                  | 1                           | 1                          | 0            | 1              | 1     | 0   | 1      | 1            | 1              | 0    | 0            | 0              | 1          | 0            | 0               | 0           | 1           | 0      | 0      | 0    | 0               | 0      | 0                  | 0          | 0       | 0           | 0          |
| 26 | 25       | 0            | 26          | 1                         | 4                                  | 1                           | 1                          | 0            | 1              | 0     | 0   | 0      | 1            | 0              | 0    | 0            | 0              | 0          | 0            | 0               | 1           | 1           | 0      | 0      | 0    | 0               | 0      | 0                  | 0          | 1       | 0           | 0          |
| 27 | 26       | 0            | 27          | 1                         | 4                                  | 1                           | 1                          | 0            | 0              | 0     | 1   | 0      | 1            | 0              | 0    | 0            | 0              | 0          | 1            | 0               | 0           | 1           | 0      | 0      | 0    | 0               | 0      | 0                  | 0          | 1       | 0           | 0          |
| 28 | 27       | 0            | 36          | 1                         | 3                                  | 1                           | 1                          | 0            | 0              | 0     | 1   | 1      | 1            | 0              | 0    | 0            | 0              | 0          | 0            | 0               | 1           | 1           | 0      | 0      | 0    | 0               | 0      | 0                  | 0          | 1       | 0           | 0          |
| 29 | 28       | 1            | 49          | 1                         | 5                                  | 1                           | 1                          | 0            | 0              | 0     | 1   | 0      | 1            | 0              | 0    | 0            | 0              | 1          | 0            | 0               | 1           | 1           | 0      | 0      | 0    | 0               | 1      | 0                  | 0          | 1       | 0           | 0          |
| 30 | 29       | 1            | 23          | 0                         | 3                                  | 1                           | 1                          | 0            | 0              | 0     | 1   | 0      | 0            | 1              | 0    | 0            | 0              | 1          | 0            | 1               | 0           | 0           | 0      | 0      | 0    | 0               | 0      | 0                  | 0          | 0       | 1           | 1          |
| 31 | 30       | 0            | 46          | 1                         | 4                                  | 1                           | 1                          | 0            | 1              | 0     | 0   | 0      | 1            | 0              | 0    | 0            | 0              | 0          | 0            | 0               | 0           | 1           | 0      | 0      | 0    | 0               | 0      | 0                  | 0          | 1       | 0           | 0          |
| 32 | 31       | 1            | 47          | 1                         | 4                                  | 1                           | 1                          | 0            | 1              | 0     | 0   | 1      | 1            | 0              | 0    | 0            | 0              | 0          | 0            | 0               | 1           | 1           | 0      | 0      | 0    | 0               | 0      | 0                  | 0          | 1       | 0           | 0          |
| 33 | 32       | 0            | 53          | 1                         | 4                                  | 1                           | 1                          | 0            | 0              | 0     | 1   | 0      | 1            | 0              | 0    | 0            | 0              | 1          | 0            | 0               | 1           | 1           | 0      | 0      | 0    | 0               | 0      | 0                  | 0          | 0       | 0           | 0          |
| 34 | 33       | 0            | 48          | 1                         | 4                                  | 1                           | 1                          | 0            | 1              | 0     | 0   | 0      | 1            | 0              | 0    | 0            | 0              | 0          | 0            | 0               | 0           | 1           | 0      | 0      | 0    | 0               | 0      | 0                  | 0          | 1       | 0           | 0          |
| 35 | 34       | 1            | 52          | 1                         | 4                                  | 1                           | 1                          | 0            | 1              | 0     | 0   | 1      | 0            | 0              | 0    | 0            | 0              | 1          | 0            | 0               | 0           | 1           | 0      | 0      | 0    | 0               | 0      | 0                  | 1          | 0       | 0           | 0          |
| 36 | 35       | 0            | 23          | 1                         | 3                                  | 0                           | 1                          | 0            | 0              | 0     | 1   | 0      | 0            | 0              | 1    | 0            | 0              | 1          | 1            | 0               | 0           | 0           | 0      | 0      | 0    | 0               | 0      | 0                  | 1          | 0       | 0           | 0          |
| 37 | 36       | 0            | 44          | 0                         | 3                                  | 1                           | 1                          | 0            | 1              | 0     | 0   | 0      | 1            | 0              | 0    | 0            | 0              | 0          | 0            | 0               | 1           | 1           | 0      | 0      | 0    | 0               | 0      | 0                  | 0          | 0       | 1           | 0          |
| 38 | 37       | 0            | 26          | 1                         | 4                                  | 1                           | 1                          | 0            | 1              | 0     | 0   | 1      | 1            | 0              | 0    | 0            | 0              | 1          | 1            | 0               | 1           | 1           | 0      | 0      | 0    | 0               | 0      | 0                  | 1          | 0       | 1           | 0          |
| 39 | 38       | 0            | 26          | 1                         | 5                                  | 1                           | 1                          | 0            | 0              | 0     | 1   | 0      | 0            | 0              | 1    | 0            | 0              | 1          | 0            | 0               | 1           | 1           | 0      | 0      | 0    | 0               | 0      | 0                  | 1          | 0       | 0           | 0          |
| 40 | 39       | 0            | 44          | 1                         | 5                                  | 1                           | 1                          | 0            | 1              | 0     | 0   | 0      | 1            | 1              | 0    | 0            | 0              | 0          | 0            | 0               | 1           | 1           | 0      | 0      | 0    | 0               | 0      | 0                  | 0          | 0       | 0           | 0          |
| 41 | 40       | 0            | 21          | 1                         | 5                                  | 1                           | 0                          | 0            | 1              | 0     | 0   | 1      | 1            | 0              | 0    | 1            | 0              | 1          | 1            | 0               | 1           | 1           | 0      | 0      | 0    | 0               | 0      | 0                  | 1          | 0       | 0           | 0          |

|    | A        | B            | C           | D                         | E                                  | F                           | G                          | H            | I              | J     | K   | L      | M            | N              | O    | P            | Q              | R          | S            | T               | U           | V           | W      | X      | Y    | Z               | AA     | AB                 | AC          | AD      | AE          | AF         |
|----|----------|--------------|-------------|---------------------------|------------------------------------|-----------------------------|----------------------------|--------------|----------------|-------|-----|--------|--------------|----------------|------|--------------|----------------|------------|--------------|-----------------|-------------|-------------|--------|--------|------|-----------------|--------|--------------------|-------------|---------|-------------|------------|
| 1  | Consumer | Gender OF 1M | Age (cont.) | Usual consumer 0 no 1 yes | Freshness 1 not fresh 5 very fresh | will to purchase 0 no 1 yes | will to consume 0 no 1 yes | storage time | Moisten aspect | Slime | Dry | Bright | Cured aspect | Brownish color | Dull | Darker spots | Greenish spots | Wine aroma | garlic aroma | Fermented aroma | Smoke aroma | Cured aroma | Rancid | Sulfur | Mold | Ammoniac/rotten | Butter | Sour/vinegar aroma | Salty taste | Piquant | Sweet taste | Acid taste |
| 42 | 41       | 0            | 28          | 1                         | 5                                  | 1                           | 0                          | 0            | 1              | 0     | 0   | 1      | 1            | 0              | 0    | 0            | 0              | 1          | 1            | 0               | 1           | 0           | 0      | 0      | 0    | 0               | 0      | 0                  | 1           | 0       | 0           | 0          |
| 43 | 42       | 0            | 24          | 1                         | 5                                  | 1                           | 1                          | 0            | 0              | 0     | 1   | 1      | 1            | 0              | 0    | 0            | 0              | 1          | 0            | 0               | 0           | 1           | 0      | 0      | 0    | 0               | 0      | 0                  | 1           | 0       | 0           | 0          |
| 44 | 43       | 0            | 23          | 1                         | 4                                  | 1                           | 1                          | 0            | 0              | 0     | 1   | 0      | 0            | 1              | 0    | 0            | 0              | 0          | 1            | 0               | 0           | 0           | 0      | 0      | 0    | 0               | 0      | 0                  | 1           | 0       | 0           | 0          |
| 45 | 44       | 1            | 32          | 1                         | 4                                  | 1                           | 1                          | 0            | 0              | 0     | 1   | 0      | 1            | 0              | 0    | 0            | 0              | 0          | 0            | 0               | 0           | 1           | 0      | 0      | 0    | 0               | 0      | 0                  | 1           | 0       | 0           | 0          |
| 46 | 45       | 1            | 55          | 1                         | 5                                  | 1                           | 1                          | 0            | 0              | 0     | 1   | 0      | 1            | 0              | 0    | 0            | 0              | 1          | 1            | 0               | 1           | 1           | 0      | 0      | 0    | 0               | 0      | 0                  | 1           | 0       | 0           | 0          |
| 47 | 46       | 1            | 54          | 1                         | 4                                  | 1                           | 1                          | 0            | 0              | 0     | 1   | 0      | 1            | 1              | 0    | 0            | 0              | 1          | 1            | 0               | 1           | 1           | 0      | 0      | 0    | 0               | 0      | 0                  | 0           | 0       | 1           | 0          |
| 48 | 47       | 0            | 57          | 0                         | 5                                  | 1                           | 1                          | 0            | 0              | 0     | 1   | 1      | 1            | 0              | 0    | 0            | 0              | 0          | 0            | 0               | 0           | 1           | 0      | 0      | 0    | 0               | 0      | 0                  | 1           | 0       | 0           | 0          |
| 49 | 48       | 1            | 42          | 1                         | 5                                  | 1                           | 1                          | 0            | 1              | 0     | 0   | 0      | 1            | 0              | 0    | 0            | 0              | 0          | 0            | 0               | 1           | 1           | 0      | 0      | 0    | 0               | 0      | 0                  | 1           | 0       | 0           | 0          |
| 50 | 49       | 0            | 26          | 1                         | 4                                  | 1                           | 1                          | 0            | 1              | 0     | 0   | 0      | 1            | 0              | 0    | 0            | 0              | 0          | 0            | 0               | 0           | 1           | 0      | 0      | 0    | 0               | 0      | 0                  | 1           | 0       | 0           | 0          |
| 51 | 50       | 0            | 56          | 1                         | 5                                  | 1                           | 1                          | 0            | 0              | 0     | 1   | 0      | 1            | 0              | 0    | 0            | 0              | 0          | 0            | 0               | 1           | 0           | 0      | 0      | 0    | 0               | 0      | 0                  | 1           | 0       | 0           | 0          |
| 52 | 51       | 1            | 29          | 1                         | 5                                  | 1                           | 1                          | 0            | 1              | 0     | 0   | 0      | 1            | 0              | 0    | 0            | 0              | 0          | 0            | 0               | 1           | 1           | 0      | 0      | 0    | 0               | 0      | 0                  | 1           | 0       | 0           | 0          |
| 53 | 52       | 0            | 26          | 1                         | 4                                  | 1                           | 1                          | 0            | 0              | 0     | 1   | 0      | 1            | 0              | 1    | 0            | 0              | 0          | 0            | 0               | 1           | 1           | 0      | 0      | 0    | 0               | 0      | 0                  | 1           | 0       | 0           | 0          |
| 54 | 53       | 0            | 26          | 0                         | 4                                  | 1                           | 1                          | 0            | 0              | 0     | 1   | 0      | 1            | 0              | 0    | 0            | 0              | 1          | 0            | 0               | 0           | 1           | 0      | 0      | 0    | 0               | 0      | 0                  | 0           | 1       | 0           | 0          |
| 55 | 54       | 0            | 60          | 1                         | 3                                  | 0                           | 0                          | 0            | 1              | 0     | 0   | 0      | 0            | 0              | 1    | 0            | 0              | 1          | 0            | 0               | 1           | 0           | 0      | 0      | 0    | 0               | 0      | 0                  | 1           | 0       | 0           | 0          |
| 56 | 55       | 0            | 50          | 1                         | 4                                  | 1                           | 1                          | 0            | 0              | 1     | 0   | 1      | 0            | 0              | 0    | 0            | 0              | 0          | 0            | 0               | 1           | 1           | 0      | 0      | 0    | 0               | 0      | 0                  | 1           | 0       | 0           | 0          |
| 57 | 56       | 0            | 54          | 1                         | 4                                  | 1                           | 1                          | 0            | 0              | 0     | 1   | 0      | 1            | 0              | 1    | 0            | 0              | 1          | 1            | 0               | 0           | 1           | 0      | 0      | 0    | 0               | 0      | 1                  | 1           | 0       | 0           | 1          |
| 58 | 57       | 1            | 38          | 1                         | 5                                  | 1                           | 1                          | 0            | 0              | 0     | 1   | 0      | 1            | 0              | 0    | 0            | 0              | 1          | 0            | 0               | 0           | 1           | 0      | 0      | 0    | 0               | 0      | 0                  | 0           | 0       | 0           | 0          |
| 59 | 58       | 0            | 24          | 1                         | 5                                  | 1                           | 1                          | 0            | 0              | 0     | 1   | 0      | 1            | 0              | 0    | 0            | 0              | 1          | 0            | 0               | 0           | 1           | 0      | 0      | 0    | 0               | 0      | 0                  | 0           | 0       | 0           | 0          |
| 60 | 59       | 0            | 23          | 1                         | 5                                  | 1                           | 1                          | 0            | 0              | 0     | 1   | 0      | 1            | 0              | 0    | 0            | 0              | 1          | 0            | 0               | 1           | 1           | 0      | 0      | 0    | 0               | 0      | 0                  | 0           | 0       | 0           | 0          |
| 61 | 60       | 1            | 22          | 1                         | 4                                  | 1                           | 1                          | 0            | 0              | 0     | 1   | 1      | 0            | 0              | 0    | 1            | 0              | 1          | 0            | 0               | 0           | 1           | 0      | 0      | 0    | 0               | 0      | 0                  | 1           | 0       | 0           | 0          |



|     | A        | B            | C           | D                         | E                                  | F                           | G                          | H            | I              | J     | K   | L      | M            | N              | O    | P            | Q              | R          | S            | T               | U           | V           | W      | X      | Y    | Z               | AA     | AB                 | AC          | AD      | AE          | AF         |
|-----|----------|--------------|-------------|---------------------------|------------------------------------|-----------------------------|----------------------------|--------------|----------------|-------|-----|--------|--------------|----------------|------|--------------|----------------|------------|--------------|-----------------|-------------|-------------|--------|--------|------|-----------------|--------|--------------------|-------------|---------|-------------|------------|
| 1   | Consumer | Gender OF 1M | Age (cont.) | Usual consumer 0 no 1 yes | Freshness 1 not fresh 5 very fresh | will to purchase 0 no 1 yes | will to consume 0 no 1 yes | storage time | Moisten aspect | Slime | Dry | Bright | Cured aspect | Brownish color | Dull | Darker spots | Greenish spots | Wine aroma | garlic aroma | Fermented aroma | Smoke aroma | Cured aroma | Rancid | Sulfur | Mold | Ammoniac/rotten | Butter | Sour/vinegar aroma | Salty taste | Piquant | Sweet taste | Acid taste |
| 82  | 81       | 0            | 27          | 1                         | 4                                  | 1                           | 1                          | 0            | 1              | 0     | 0   | 0      | 1            | 0              | 0    | 0            | 0              | 0          | 0            | 0               | 1           | 0           | 0      | 0      | 0    | 0               | 0      | 0                  | 1           | 0       | 0           | 0          |
| 83  | 1        | 1            | 24          | 1                         | 2                                  | 1                           | 1                          | 21           | 0              | 0     | 1   | 0      | 0            | 1              | 1    | 0            | 0              | 0          | 0            | 0               | 1           | 1           | 0      | 0      | 0    | 0               | 0      | 1                  | 1           | 0       | 1           | 1          |
| 84  | 2        | 0            | 23          | 1                         | 4                                  | 1                           | 1                          | 21           | 0              | 0     | 1   | 0      | 0            | 0              | 1    | 0            | 0              | 1          | 0            | 0               | 0           | 0           | 0      | 0      | 0    | 0               | 0      | 0                  | 1           | 0       | 0           | 0          |
| 85  | 3        | 1            | 53          | 1                         | 4                                  | 1                           | 1                          | 21           | 1              | 0     | 0   | 0      | 1            | 0              | 0    | 0            | 0              | 1          | 0            | 0               | 0           | 0           | 0      | 0      | 0    | 0               | 0      | 0                  | 1           | 0       | 0           | 0          |
| 86  | 4        | 0            | 52          | 1                         | 3                                  | 1                           | 1                          | 21           | 1              | 0     | 0   | 1      | 1            | 0              | 0    | 0            | 0              | 1          | 1            | 0               | 1           | 0           | 0      | 0      | 0    | 0               | 0      | 0                  | 1           | 0       | 0           | 0          |
| 87  | 5        | 0            | 23          | 1                         | 5                                  | 1                           | 1                          | 21           | 0              | 0     | 1   | 1      | 1            | 0              | 0    | 0            | 0              | 1          | 1            | 0               | 0           | 1           | 0      | 0      | 0    | 0               | 0      | 0                  | 0           | 0       | 1           | 0          |
| 88  | 6        | 0            | 23          | 1                         | 4                                  | 1                           | 1                          | 21           | 0              | 0     | 1   | 0      | 1            | 0              | 0    | 0            | 0              | 1          | 1            | 0               | 0           | 1           | 0      | 0      | 0    | 0               | 0      | 0                  | 1           | 0       | 0           | 0          |
| 89  | 7        | 1            | 55          | 1                         | 2                                  | 0                           | 0                          | 21           | 0              | 0     | 1   | 0      | 1            | 0              | 1    | 0            | 0              | 1          | 1            | 0               | 1           | 1           | 0      | 0      | 0    | 0               | 0      | 1                  | 1           | 0       | 0           | 1          |
| 90  | 8        | 0            | 54          | 1                         | 5                                  | 1                           | 1                          | 21           | 0              | 0     | 1   | 1      | 1            | 0              | 0    | 0            | 0              | 1          | 0            | 0               | 1           | 1           | 0      | 0      | 0    | 0               | 0      | 0                  | 1           | 0       | 0           | 0          |
| 91  | 9        | 1            | 21          | 1                         | 4                                  | 1                           | 1                          | 21           | 0              | 1     | 0   | 0      | 1            | 0              | 0    | 0            | 0              | 0          | 0            | 0               | 1           | 1           | 0      | 0      | 0    | 0               | 0      | 0                  | 1           | 0       | 0           | 0          |
| 92  | 10       | 1            | 55          | 1                         | 4                                  | 1                           | 1                          | 21           | 0              | 0     | 1   | 0      | 1            | 0              | 1    | 0            | 0              | 1          | 1            | 0               | 1           | 1           | 0      | 0      | 0    | 0               | 0      | 1                  | 1           | 0       | 0           | 1          |
| 93  | 11       | 0            | 23          | 0                         | 4                                  | 1                           | 1                          | 21           | 1              | 1     | 0   | 1      | 1            | 0              | 0    | 0            | 0              | 0          | 1            | 0               | 1           | 1           | 0      | 0      | 0    | 0               | 0      | 0                  | 1           | 0       | 0           | 0          |
| 94  | 12       | 0            | 52          | 1                         | 3                                  | 1                           | 1                          | 21           | 0              | 0     | 1   | 0      | 1            | 0              | 0    | 0            | 0              | 0          | 0            | 0               | 1           | 1           | 0      | 0      | 0    | 0               | 0      | 0                  | 1           | 0       | 0           | 0          |
| 95  | 13       | 1            | 50          | 0                         | 4                                  | 1                           | 1                          | 21           | 0              | 0     | 1   | 0      | 1            | 0              | 0    | 0            | 0              | 1          | 0            | 0               | 1           | 1           | 0      | 0      | 0    | 0               | 0      | 0                  | 0           | 0       | 0           | 0          |
| 96  | 14       | 1            | 85          | 1                         | 3                                  | 1                           | 1                          | 21           | 1              | 0     | 0   | 0      | 0            | 0              | 1    | 0            | 0              | 0          | 0            | 0               | 0           | 1           | 0      | 0      | 0    | 0               | 0      | 0                  | 1           | 0       | 0           | 0          |
| 97  | 15       | 1            | 60          | 0                         | 3                                  | 1                           | 0                          | 21           | 0              | 0     | 1   | 0      | 1            | 0              | 0    | 0            | 0              | 0          | 0            | 0               | 0           | 0           | 0      | 0      | 0    | 0               | 0      | 0                  | 1           | 0       | 0           | 0          |
| 98  | 16       | 0            | 58          | 1                         | 5                                  | 1                           | 1                          | 21           | 0              | 0     | 1   | 0      | 1            | 0              | 0    | 0            | 0              | 0          | 1            | 0               | 0           | 1           | 0      | 0      | 0    | 0               | 0      | 0                  | 1           | 0       | 0           | 0          |
| 99  | 17       | 1            | 30          | 1                         | 5                                  | 1                           | 1                          | 21           | 0              | 0     | 1   | 0      | 1            | 0              | 0    | 0            | 0              | 1          | 1            | 0               | 0           | 1           | 0      | 0      | 0    | 0               | 0      | 0                  | 1           | 0       | 0           | 0          |
| 100 | 18       | 0            | 59          | 1                         | 3                                  | 0                           | 1                          | 21           | 0              | 0     | 1   | 0      | 1            | 0              | 0    | 0            | 0              | 0          | 0            | 0               | 0           | 0           | 0      | 0      | 1    | 0               | 0      | 0                  | 1           | 0       | 0           | 0          |
| 101 | 19       | 0            | 23          | 1                         | 3                                  | 0                           | 0                          | 21           | 0              | 0     | 1   | 0      | 1            | 1              | 1    | 0            | 0              | 0          | 0            | 0               | 1           | 1           | 0      | 0      | 0    | 0               | 0      | 1                  | 1           | 0       | 0           | 0          |



|     | A        | B            | C           | D                         | E                                  | F                           | G                          | H            | I              | J     | K   | L      | M            | N              | O    | P            | Q              | R          | S            | T               | U           | V           | W      | X      | Y    | Z               | AA     | AB                 | AC         | AD      | AE          | AF         |
|-----|----------|--------------|-------------|---------------------------|------------------------------------|-----------------------------|----------------------------|--------------|----------------|-------|-----|--------|--------------|----------------|------|--------------|----------------|------------|--------------|-----------------|-------------|-------------|--------|--------|------|-----------------|--------|--------------------|------------|---------|-------------|------------|
| 1   | Consumer | Gender OF 1M | Age (cont.) | Usual consumer 0 no 1 yes | Freshness 1 not fresh 5 very fresh | will to purchase 0 no 1 yes | will to consume 0 no 1 yes | storage time | Moisten aspect | Slime | Dry | Bright | Cured aspect | Brownish color | Dull | Darker spots | Greenish spots | Wine aroma | garlic aroma | Fermented aroma | Smoke aroma | Cured aroma | Rancid | Sulfur | Mold | Ammoniac/rotten | Butter | Sour/vinegar aroma | Salty tase | Piquant | Sweet taste | Acid taste |
| 122 | 40       | 0            | 21          | 1                         | 3                                  | 1                           | 1                          | 21           | 1              | 0     | 0   | 1      | 0            | 0              | 0    | 0            | 0              | 0          | 0            | 0               | 0           | 0           | 0      | 0      | 0    | 0               | 0      | 0                  | 1          | 0       | 0           | 1          |
| 123 | 41       | 0            | 28          | 1                         | 4                                  | 1                           | 1                          | 21           | 1              | 0     | 0   | 0      | 1            | 1              | 0    | 0            | 0              | 1          | 0            | 0               | 0           | 1           | 0      | 0      | 0    | 0               | 0      | 0                  | 0          | 0       | 0           | 0          |
| 124 | 42       | 0            | 24          | 1                         | 3                                  | 1                           | 1                          | 21           | 1              | 0     | 0   | 1      | 0            | 0              | 0    | 0            | 0              | 0          | 0            | 0               | 0           | 1           | 0      | 0      | 0    | 0               | 0      | 0                  | 0          | 0       | 0           | 0          |
| 125 | 43       | 0            | 23          | 1                         | 3                                  | 1                           | 1                          | 21           | 1              | 0     | 0   | 0      | 1            | 0              | 0    | 0            | 0              | 1          | 1            | 0               | 0           | 0           | 0      | 0      | 0    | 0               | 0      | 0                  | 1          | 0       | 0           | 0          |
| 126 | 44       | 1            | 32          | 1                         | 3                                  | 1                           | 1                          | 21           | 1              | 0     | 0   | 1      | 0            | 0              | 0    | 0            | 0              | 0          | 0            | 0               | 0           | 1           | 0      | 0      | 0    | 0               | 0      | 0                  | 0          | 0       | 0           | 0          |
| 127 | 45       | 1            | 55          | 1                         | 4                                  | 1                           | 1                          | 21           | 0              | 0     | 1   | 0      | 1            | 0              | 0    | 0            | 0              | 1          | 1            | 1               | 1           | 1           | 0      | 0      | 0    | 0               | 0      | 0                  | 1          | 1       | 1           | 1          |
| 128 | 46       | 1            | 54          | 1                         | 5                                  | 0                           | 1                          | 21           | 1              | 0     | 0   | 0      | 1            | 0              | 0    | 0            | 0              | 0          | 0            | 0               | 0           | 1           | 0      | 0      | 0    | 0               | 0      | 0                  | 0          | 0       | 1           | 0          |
| 129 | 47       | 0            | 57          | 0                         | 4                                  | 1                           | 1                          | 21           | 1              | 0     | 0   | 1      | 0            | 0              | 0    | 0            | 0              | 0          | 0            | 0               | 0           | 1           | 0      | 0      | 0    | 0               | 0      | 0                  | 1          | 0       | 0           | 0          |
| 130 | 48       | 1            | 42          | 1                         | 4                                  | 1                           | 1                          | 21           | 0              | 0     | 0   | 1      | 0            | 0              | 0    | 1            | 0              | 1          | 1            | 0               | 0           | 1           | 0      | 0      | 0    | 0               | 0      | 0                  | 1          | 0       | 1           | 0          |
| 131 | 49       | 0            | 26          | 1                         | 5                                  | 1                           | 1                          | 21           | 1              | 0     | 0   | 0      | 1            | 0              | 0    | 0            | 0              | 1          | 1            | 0               | 0           | 1           | 0      | 0      | 0    | 0               | 0      | 0                  | 0          | 0       | 0           | 0          |
| 132 | 50       | 0            | 56          | 1                         | 5                                  | 1                           | 1                          | 21           | 1              | 0     | 1   | 1      | 1            | 0              | 0    | 0            | 0              | 0          | 1            | 0               | 1           | 1           | 0      | 0      | 0    | 0               | 0      | 0                  | 0          | 1       | 0           | 0          |
| 133 | 51       | 1            | 29          | 1                         | 4                                  | 0                           | 1                          | 21           | 0              | 1     | 0   | 0      | 1            | 0              | 0    | 0            | 0              | 0          | 1            | 0               | 0           | 1           | 0      | 0      | 0    | 0               | 0      | 0                  | 0          | 0       | 0           | 1          |
| 134 | 52       | 0            | 26          | 1                         | 4                                  | 1                           | 1                          | 21           | 0              | 0     | 1   | 0      | 1            | 0              | 1    | 0            | 0              | 0          | 0            | 0               | 1           | 0           | 0      | 0      | 0    | 0               | 0      | 0                  | 1          | 0       | 0           | 0          |
| 135 | 53       | 0            | 26          | 0                         | 4                                  | 1                           | 1                          | 21           | 1              | 0     | 0   | 1      | 1            | 0              | 0    | 0            | 0              | 0          | 1            | 1               | 0           | 1           | 0      | 0      | 0    | 0               | 0      | 0                  | 1          | 0       | 0           | 1          |
| 136 | 54       | 0            | 60          | 1                         | 4                                  | 1                           | 1                          | 21           | 0              | 1     | 0   | 1      | 1            | 0              | 0    | 0            | 0              | 1          | 1            | 0               | 0           | 0           | 0      | 0      | 0    | 0               | 0      | 0                  | 0          | 0       | 0           | 0          |
| 137 | 55       | 0            | 50          | 1                         | 3                                  | 1                           | 1                          | 21           | 0              | 0     | 1   | 0      | 1            | 0              | 1    | 0            | 0              | 1          | 1            | 0               | 1           | 1           | 0      | 0      | 0    | 0               | 0      | 0                  | 1          | 0       | 0           | 0          |
| 138 | 56       | 0            | 54          | 1                         | 1                                  | 0                           | 0                          | 21           | 0              | 0     | 1   | 0      | 0            | 1              | 1    | 0            | 0              | 1          | 1            | 1               | 0           | 0           | 0      | 0      | 0    | 0               | 0      | 1                  | 1          | 0       | 0           | 0          |
| 139 | 57       | 1            | 38          | 1                         | 2                                  | 0                           | 1                          | 21           | 1              | 0     | 0   | 1      | 0            | 0              | 0    | 0            | 0              | 1          | 0            | 0               | 0           | 1           | 0      | 0      | 0    | 0               | 0      | 1                  | 0          | 0       | 0           | 0          |
| 140 | 58       | 0            | 24          | 1                         | 3                                  | 1                           | 1                          | 21           | 1              | 0     | 0   | 0      | 1            | 0              | 0    | 0            | 0              | 1          | 1            | 0               | 1           | 1           | 0      | 0      | 0    | 0               | 0      | 0                  | 0          | 0       | 1           | 0          |
| 141 | 59       | 0            | 23          | 1                         | 3                                  | 1                           | 1                          | 21           | 1              | 0     | 0   | 0      | 1            | 0              | 0    | 0            | 0              | 0          | 1            | 0               | 0           | 0           | 0      | 0      | 0    | 0               | 1      | 0                  | 0          | 0       | 0           | 0          |

|     | A        | B            | C           | D                         | E                                  | F                           | G                          | H            | I              | J     | K   | L      | M            | N              | O    | P            | Q              | R          | S            | T               | U           | V           | W      | X      | Y    | Z               | AA     | AB                 | AC          | AD      | AE          | AF         |
|-----|----------|--------------|-------------|---------------------------|------------------------------------|-----------------------------|----------------------------|--------------|----------------|-------|-----|--------|--------------|----------------|------|--------------|----------------|------------|--------------|-----------------|-------------|-------------|--------|--------|------|-----------------|--------|--------------------|-------------|---------|-------------|------------|
| 1   | Consumer | Gender OF 1M | Age (cont.) | Usual consumer 0 no 1 yes | Freshness 1 not fresh 5 very fresh | will to purchase 0 no 1 yes | will to consume 0 no 1 yes | storage time | Moisten aspect | Slime | Dry | Bright | Cured aspect | Brownish color | Dull | Darker spots | Greenish spots | Wine aroma | garlic aroma | Fermented aroma | Smoke aroma | Cured aroma | Rancid | Sulfur | Mold | Ammoniac/rotten | Butter | Sour/vinegar aroma | Salty taste | Piquant | Sweet taste | Acid taste |
| 142 | 60       | 1            | 22          | 1                         | 4                                  | 1                           | 1                          | 21           | 0              | 0     | 1   | 1      | 1            | 0              | 0    | 0            | 0              | 1          | 1            | 0               | 0           | 0           | 0      | 0      | 0    | 0               | 0      | 0                  | 1           | 0       | 1           | 1          |
| 143 | 61       | 1            | 35          | 1                         | 3                                  | 1                           | 1                          | 21           | 0              | 0     | 1   | 0      | 1            | 0              | 1    | 0            | 0              | 1          | 1            | 0               | 0           | 1           | 0      | 0      | 0    | 0               | 0      | 0                  | 0           | 0       | 1           | 0          |
| 144 | 62       | 1            | 58          | 1                         | 4                                  | 1                           | 1                          | 21           | 1              | 0     | 0   | 1      | 1            | 1              | 0    | 0            | 0              | 1          | 1            | 0               | 0           | 0           | 0      | 0      | 0    | 0               | 0      | 0                  | 0           | 0       | 0           | 0          |
| 145 | 63       | 0            | 26          | 1                         | 3                                  | 1                           | 1                          | 21           | 0              | 1     | 1   | 0      | 1            | 0              | 1    | 0            | 0              | 0          | 0            | 1               | 0           | 1           | 0      | 0      | 0    | 0               | 0      | 1                  | 0           | 0       | 0           | 1          |
| 146 | 64       | 0            | 56          | 1                         | 5                                  | 1                           | 1                          | 21           | 0              | 0     | 1   | 0      | 1            | 0              | 1    | 0            | 0              | 1          | 1            | 0               | 1           | 1           | 0      | 0      | 0    | 0               | 0      | 0                  | 1           | 0       | 0           | 0          |
| 147 | 65       | 0            | 33          | 1                         | 4                                  | 1                           | 1                          | 21           | 0              | 1     | 0   | 0      | 0            | 1              | 0    | 0            | 0              | 0          | 1            | 0               | 0           | 1           | 0      | 0      | 0    | 0               | 0      | 0                  | 0           | 0       | 0           | 0          |
| 148 | 66       | 0            | 54          | 1                         | 5                                  | 1                           | 1                          | 21           | 0              | 0     | 1   | 0      | 1            | 0              | 1    | 0            | 0              | 1          | 1            | 0               | 0           | 1           | 0      | 0      | 0    | 0               | 0      | 0                  | 0           | 0       | 0           | 0          |
| 149 | 67       | 1            | 25          | 1                         | 3                                  | 0                           | 1                          | 21           | 0              | 0     | 1   | 0      | 1            | 0              | 1    | 0            | 0              | 0          | 0            | 0               | 0           | 1           | 0      | 0      | 0    | 0               | 0      | 0                  | 0           | 0       | 1           | 0          |
| 150 | 68       | 1            | 25          | 1                         | 5                                  | 1                           | 1                          | 21           | 0              | 0     | 0   | 0      | 1            | 0              | 0    | 0            | 0              | 1          | 1            | 0               | 1           | 0           | 0      | 0      | 0    | 0               | 0      | 0                  | 0           | 0       | 0           | 0          |
| 151 | 69       | 1            | 29          | 1                         | 4                                  | 1                           | 1                          | 21           | 0              | 0     | 1   | 0      | 1            | 0              | 0    | 0            | 0              | 0          | 0            | 0               | 1           | 1           | 0      | 0      | 0    | 0               | 0      | 0                  | 0           | 0       | 1           | 0          |
| 152 | 70       | 1            | 56          | 1                         | 5                                  | 1                           | 1                          | 21           | 0              | 0     | 1   | 0      | 1            | 0              | 0    | 0            | 0              | 0          | 0            | 0               | 0           | 1           | 0      | 0      | 0    | 0               | 0      | 0                  | 1           | 0       | 0           | 0          |
| 153 | 71       | 1            | 50          | 1                         | 5                                  | 1                           | 1                          | 21           | 0              | 0     | 1   | 0      | 0            | 0              | 0    | 1            | 0              | 0          | 0            | 0               | 0           | 0           | 0      | 0      | 0    | 0               | 0      | 0                  | 0           | 0       | 1           | 0          |
| 154 | 72       | 0            | 57          | 1                         | 3                                  | 1                           | 1                          | 21           | 1              | 0     | 0   | 1      | 1            | 0              | 0    | 0            | 0              | 1          | 1            | 0               | 1           | 1           | 0      | 0      | 0    | 0               | 0      | 0                  | 1           | 0       | 0           | 0          |
| 155 | 73       | 1            | 22          | 1                         | 4                                  | 1                           | 1                          | 21           | 1              | 0     | 0   | 0      | 1            | 0              | 0    | 0            | 0              | 0          | 0            | 0               | 0           | 1           | 1      | 0      | 0    | 0               | 0      | 0                  | 0           | 0       | 0           | 0          |
| 156 | 74       | 1            | 55          | 1                         | 5                                  | 1                           | 1                          | 21           | 0              | 0     | 1   | 0      | 1            | 0              | 1    | 0            | 0              | 0          | 0            | 0               | 1           | 1           | 0      | 0      | 0    | 0               | 0      | 0                  | 0           | 0       | 1           | 0          |
| 157 | 75       | 0            | 26          | 1                         | 4                                  | 1                           | 1                          | 21           | 1              | 0     | 0   | 1      | 0            | 0              | 0    | 0            | 0              | 0          | 0            | 0               | 1           | 0           | 0      | 0      | 0    | 0               | 0      | 0                  | 1           | 0       | 0           | 0          |
| 158 | 76       | 0            | 53          | 1                         | 4                                  | 1                           | 1                          | 21           | 0              | 0     | 1   | 0      | 1            | 0              | 1    | 1            | 0              | 1          | 1            | 0               | 1           | 1           | 0      | 0      | 0    | 0               | 0      | 1                  | 1           | 0       | 0           | 0          |
| 159 | 77       | 1            | 53          | 1                         | 4                                  | 1                           | 1                          | 21           | 1              | 0     | 0   | 1      | 0            | 0              | 0    | 0            | 0              | 1          | 0            | 0               | 0           | 0           | 0      | 0      | 0    | 0               | 0      | 0                  | 1           | 0       | 0           | 0          |
| 160 | 78       | 1            | 58          | 1                         | 4                                  | 0                           | 1                          | 21           | 0              | 0     | 1   | 0      | 1            | 0              | 0    | 0            | 0              | 0          | 0            | 0               | 0           | 0           | 0      | 0      | 0    | 0               | 0      | 0                  | 1           | 0       | 0           | 0          |
| 161 | 79       | 0            | 60          | 1                         | 5                                  | 1                           | 1                          | 21           | 0              | 0     | 1   | 0      | 1            | 0              | 0    | 0            | 0              | 0          | 0            | 0               | 0           | 1           | 0      | 0      | 0    | 0               | 0      | 0                  | 1           | 0       | 0           | 0          |

|     | A        | B            | C           | D                         | E                                  | F                           | G                          | H            | I              | J     | K   | L      | M            | N              | O    | P            | Q              | R          | S            | T               | U           | V           | W      | X      | Y    | Z               | AA     | AB                 | AC          | AD      | AE          | AF         |
|-----|----------|--------------|-------------|---------------------------|------------------------------------|-----------------------------|----------------------------|--------------|----------------|-------|-----|--------|--------------|----------------|------|--------------|----------------|------------|--------------|-----------------|-------------|-------------|--------|--------|------|-----------------|--------|--------------------|-------------|---------|-------------|------------|
| 1   | Consumer | Gender OF 1M | Age (cont.) | Usual consumer 0 no 1 yes | Freshness 1 not fresh 5 very fresh | will to purchase 0 no 1 yes | will to consume 0 no 1 yes | storage time | Moisten aspect | Slime | Dry | Bright | Cured aspect | Brownish color | Dull | Darker spots | Greenish spots | Wine aroma | garlic aroma | Fermented aroma | Smoke aroma | Cured aroma | Rancid | Sulfur | Mold | Ammoniac/rotten | Butter | Sour/vinegar aroma | Salty taste | Piquant | Sweet taste | Acid taste |
| 162 | 80       | 1            | 26          | 1                         | 5                                  | 1                           | 1                          | 21           | 1              | 0     | 0   | 1      | 0            | 0              | 0    | 0            | 0              | 0          | 0            | 0               | 0           | 0           | 0      | 0      | 0    | 0               | 0      | 0                  | 1           | 0       | 0           | 0          |
| 163 | 81       | 0            | 27          | 1                         | 4                                  | 1                           | 1                          | 21           | 0              | 1     | 0   | 0      | 0            | 0              | 1    | 0            | 0              | 0          | 0            | 0               | 0           | 0           | 0      | 0      | 0    | 0               | 0      | 0                  | 1           | 0       | 0           | 0          |
| 164 | 1        | 1            | 24          | 1                         | 3                                  | 1                           | 1                          | 42           | 0              | 0     | 1   | 0      | 0            | 1              | 1    | 0            | 0              | 1          | 0            | 1               | 0           | 1           | 0      | 0      | 0    | 0               | 0      | 1                  | 1           | 0       | 0           | 1          |
| 165 | 2        | 0            | 23          | 1                         | 3                                  | 0                           | 1                          | 42           | 0              | 0     | 1   | 0      | 0            | 0              | 1    | 0            | 0              | 1          | 0            | 0               | 0           | 0           | 0      | 0      | 0    | 0               | 0      | 1                  | 0           | 0       | 0           | 1          |
| 166 | 3        | 1            | 53          | 1                         | 2                                  | 0                           | 0                          | 42           | 1              | 0     | 0   | 0      | 1            | 0              | 0    | 0            | 0              | 0          | 0            | 0               | 0           | 1           | 0      | 0      | 0    | 0               | 0      | 0                  | 0           | 0       | 0           | 1          |
| 167 | 4        | 0            | 52          | 1                         | 4                                  | 1                           | 1                          | 42           | 1              | 0     | 0   | 1      | 1            | 0              | 0    | 0            | 0              | 0          | 0            | 0               | 1           | 0           | 0      | 0      | 0    | 0               | 0      | 0                  | 1           | 0       | 0           | 0          |
| 168 | 5        | 0            | 23          | 1                         | 4                                  | 1                           | 1                          | 42           | 0              | 0     | 1   | 0      | 1            | 0              | 0    | 0            | 0              | 0          | 0            | 0               | 0           | 1           | 0      | 0      | 0    | 0               | 0      | 0                  | 1           | 0       | 0           | 0          |
| 169 | 6        | 0            | 23          | 1                         | 3                                  | 1                           | 1                          | 42           | 0              | 0     | 1   | 0      | 1            | 0              | 0    | 0            | 0              | 1          | 1            | 0               | 0           | 1           | 0      | 0      | 0    | 0               | 0      | 0                  | 1           | 0       | 0           | 0          |
| 170 | 7        | 1            | 55          | 1                         | 4                                  | 1                           | 1                          | 42           | 1              | 0     | 0   | 1      | 1            | 0              | 0    | 0            | 0              | 1          | 1            | 0               | 1           | 1           | 0      | 0      | 0    | 0               | 0      | 0                  | 1           | 0       | 0           | 0          |
| 171 | 8        | 0            | 54          | 1                         | 4                                  | 1                           | 1                          | 42           | 0              | 0     | 1   | 0      | 0            | 1              | 1    | 0            | 0              | 1          | 0            | 0               | 1           | 1           | 0      | 0      | 0    | 0               | 0      | 0                  | 1           | 0       | 0           | 0          |
| 172 | 9        | 1            | 21          | 1                         | 3                                  | 0                           | 0                          | 42           | 0              | 1     | 1   | 1      | 0            | 0              | 0    | 1            | 0              | 1          | 1            | 0               | 0           | 1           | 0      | 0      | 0    | 0               | 0      | 0                  | 1           | 0       | 0           | 0          |
| 173 | 10       | 1            | 55          | 1                         | 3                                  | 1                           | 1                          | 42           | 0              | 0     | 1   | 0      | 1            | 0              | 1    | 0            | 0              | 0          | 0            | 0               | 1           | 1           | 0      | 0      | 0    | 0               | 0      | 0                  | 0           | 0       | 0           | 1          |
| 174 | 11       | 0            | 23          | 0                         | 3                                  | 1                           | 0                          | 42           | 0              | 0     | 1   | 0      | 1            | 0              | 1    | 0            | 0              | 1          | 1            | 0               | 1           | 1           | 0      | 0      | 0    | 0               | 0      | 1                  | 1           | 0       | 0           | 1          |
| 175 | 12       | 0            | 52          | 1                         | 5                                  | 1                           | 1                          | 42           | 0              | 0     | 0   | 1      | 1            | 0              | 0    | 0            | 0              | 1          | 1            | 0               | 1           | 1           | 0      | 0      | 0    | 0               | 0      | 0                  | 1           | 0       | 0           | 0          |
| 176 | 13       | 1            | 50          | 0                         | 3                                  | 1                           | 1                          | 42           | 0              | 0     | 1   | 0      | 1            | 0              | 0    | 0            | 0              | 1          | 0            | 0               | 1           | 1           | 0      | 0      | 0    | 0               | 0      | 0                  | 1           | 0       | 0           | 0          |
| 177 | 14       | 1            | 85          | 1                         | 3                                  | 1                           | 1                          | 42           | 0              | 0     | 1   | 0      | 1            | 0              | 1    | 0            | 0              | 1          | 0            | 0               | 1           | 1           | 0      | 0      | 0    | 0               | 0      | 0                  | 1           | 0       | 0           | 0          |
| 178 | 15       | 1            | 60          | 0                         | 3                                  | 1                           | 1                          | 42           | 0              | 0     | 1   | 0      | 1            | 0              | 0    | 0            | 0              | 0          | 0            | 0               | 0           | 1           | 0      | 0      | 0    | 0               | 0      | 0                  | 1           | 0       | 0           | 0          |
| 179 | 16       | 0            | 58          | 1                         | 3                                  | 0                           | 1                          | 42           | 0              | 0     | 1   | 0      | 1            | 0              | 0    | 0            | 0              | 1          | 1            | 0               | 0           | 1           | 0      | 0      | 0    | 0               | 0      | 0                  | 0           | 0       | 0           | 0          |
| 180 | 17       | 1            | 30          | 1                         | 5                                  | 1                           | 1                          | 42           | 0              | 0     | 1   | 0      | 1            | 0              | 0    | 0            | 0              | 0          | 1            | 0               | 0           | 1           | 0      | 0      | 0    | 0               | 0      | 0                  | 1           | 0       | 0           | 0          |
| 181 | 18       | 0            | 59          | 1                         | 5                                  | 1                           | 1                          | 42           | 0              | 0     | 1   | 0      | 1            | 0              | 0    | 0            | 0              | 1          | 1            | 1               | 0           | 1           | 0      | 0      | 0    | 0               | 0      | 0                  | 1           | 0       | 0           | 0          |

|     | A        | B            | C           | D                         | E                                  | F                           | G                          | H            | I              | J     | K   | L      | M            | N              | O    | P            | Q              | R          | S            | T               | U           | V           | W      | X      | Y    | Z               | AA     | AB                 | AC         | AD      | AE          | AF         |
|-----|----------|--------------|-------------|---------------------------|------------------------------------|-----------------------------|----------------------------|--------------|----------------|-------|-----|--------|--------------|----------------|------|--------------|----------------|------------|--------------|-----------------|-------------|-------------|--------|--------|------|-----------------|--------|--------------------|------------|---------|-------------|------------|
| 1   | Consumer | Gender OF 1M | Age (cont.) | Usual consumer 0 no 1 yes | Freshness 1 not fresh 5 very fresh | will to purchase 0 no 1 yes | will to consume 0 no 1 yes | storage time | Moisten aspect | Slime | Dry | Bright | Cured aspect | Brownish color | Dull | Darker spots | Greenish spots | Wine aroma | garlic aroma | Fermented aroma | Smoke aroma | Cured aroma | Rancid | Sulfur | Mold | Ammoniac/rotten | Butter | Sour/vinegar aroma | Salty tase | Piquant | Sweet taste | Acid taste |
| 182 | 19       | 0            | 23          | 1                         | 2                                  | 0                           | 0                          | 42           | 0              | 1     | 0   | 0      | 0            | 0              | 1    | 0            | 0              | 0          | 0            | 0               | 0           | 0           | 0      | 0      | 0    | 0               | 0      | 1                  | 0          | 0       | 0           | 1          |
| 183 | 20       | 0            | 22          | 0                         | 1                                  | 0                           | 0                          | 42           | 0              | 0     | 1   | 0      | 0            | 1              | 1    | 1            | 0              | 0          | 0            | 0               | 1           | 1           | 1      | 0      | 1    | 0               | 0      | 1                  | 1          | 0       | 0           | 0          |
| 184 | 21       | 0            | 23          | 1                         | 3                                  | 0                           | 1                          | 42           | 0              | 0     | 1   | 0      | 0            | 0              | 1    | 0            | 0              | 0          | 1            | 0               | 0           | 1           | 0      | 0      | 0    | 0               | 0      | 0                  | 1          | 0       | 0           | 0          |
| 185 | 22       | 0            | 28          | 1                         | 4                                  | 1                           | 1                          | 42           | 1              | 0     | 0   | 0      | 0            | 0              | 1    | 0            | 0              | 1          | 0            | 0               | 0           | 0           | 0      | 0      | 0    | 0               | 0      | 0                  | 1          | 0       | 0           | 0          |
| 186 | 23       | 1            | 23          | 1                         | 4                                  | 1                           | 1                          | 42           | 0              | 1     | 0   | 0      | 1            | 0              | 0    | 0            | 0              | 0          | 0            | 0               | 0           | 1           | 0      | 0      | 0    | 0               | 0      | 0                  | 1          | 0       | 0           | 0          |
| 187 | 24       | 1            | 39          | 1                         | 4                                  | 1                           | 1                          | 42           | 1              | 0     | 0   | 1      | 1            | 0              | 0    | 1            | 0              | 1          | 1            | 0               | 1           | 1           | 0      | 0      | 0    | 0               | 0      | 0                  | 0          | 0       | 0           | 0          |
| 188 | 25       | 0            | 26          | 1                         | 4                                  | 1                           | 1                          | 42           | 1              | 0     | 0   | 0      | 1            | 0              | 0    | 0            | 0              | 1          | 1            | 0               | 0           | 1           | 0      | 0      | 0    | 0               | 0      | 0                  | 1          | 0       | 0           | 1          |
| 189 | 26       | 0            | 27          | 1                         | 4                                  | 1                           | 1                          | 42           | 0              | 1     | 1   | 1      | 1            | 1              | 0    | 0            | 0              | 1          | 1            | 0               | 1           | 1           | 0      | 0      | 0    | 0               | 0      | 0                  | 1          | 0       | 1           | 0          |
| 190 | 27       | 0            | 36          | 1                         | 5                                  | 1                           | 1                          | 42           | 1              | 0     | 0   | 1      | 1            | 0              | 0    | 0            | 0              | 0          | 1            | 0               | 1           | 1           | 0      | 0      | 0    | 0               | 0      | 0                  | 1          | 0       | 0           | 0          |
| 191 | 28       | 1            | 49          | 1                         | 4                                  | 1                           | 1                          | 42           | 1              | 0     | 0   | 1      | 1            | 1              | 0    | 0            | 0              | 1          | 1            | 0               | 0           | 0           | 0      | 0      | 0    | 0               | 0      | 0                  | 0          | 0       | 0           | 0          |
| 192 | 29       | 1            | 23          | 0                         | 4                                  | 1                           | 1                          | 42           | 0              | 1     | 1   | 0      | 0            | 0              | 1    | 1            | 0              | 0          | 0            | 0               | 0           | 1           | 0      | 0      | 0    | 0               | 0      | 0                  | 0          | 0       | 0           | 1          |
| 193 | 30       | 0            | 46          | 1                         | 4                                  | 1                           | 1                          | 42           | 0              | 0     | 1   | 0      | 1            | 0              | 1    | 0            | 0              | 1          | 1            | 0               | 1           | 1           | 0      | 0      | 0    | 0               | 0      | 1                  | 1          | 0       | 0           | 0          |
| 194 | 31       | 1            | 47          | 1                         | 4                                  | 1                           | 1                          | 42           | 1              | 0     | 0   | 0      | 0            | 0              | 1    | 0            | 0              | 0          | 1            | 0               | 0           | 1           | 0      | 0      | 0    | 0               | 0      | 0                  | 0          | 0       | 0           | 0          |
| 195 | 32       | 0            | 53          | 1                         | 5                                  | 1                           | 1                          | 42           | 0              | 0     | 1   | 1      | 1            | 0              | 0    | 0            | 0              | 1          | 1            | 0               | 0           | 1           | 0      | 0      | 0    | 0               | 0      | 0                  | 0          | 1       | 0           | 0          |
| 196 | 33       | 0            | 48          | 1                         | 5                                  | 1                           | 1                          | 42           | 0              | 0     | 0   | 1      | 1            | 0              | 0    | 0            | 0              | 1          | 1            | 0               | 1           | 1           | 0      | 0      | 0    | 0               | 0      | 0                  | 1          | 1       | 0           | 0          |
| 197 | 34       | 1            | 52          | 1                         | 4                                  | 1                           | 1                          | 42           | 0              | 0     | 0   | 1      | 0            | 0              | 0    | 0            | 0              | 1          | 1            | 0               | 1           | 0           | 0      | 0      | 0    | 0               | 0      | 0                  | 0          | 0       | 0           | 1          |
| 198 | 35       | 0            | 23          | 1                         | 2                                  | 0                           | 0                          | 42           | 0              | 0     | 1   | 0      | 1            | 0              | 0    | 0            | 0              | 1          | 0            | 0               | 0           | 1           | 0      | 0      | 0    | 0               | 0      | 1                  | 0          | 0       | 0           | 0          |
| 199 | 36       | 0            | 44          | 0                         | 5                                  | 1                           | 1                          | 42           | 0              | 1     | 0   | 1      | 0            | 0              | 0    | 0            | 0              | 0          | 0            | 0               | 0           | 1           | 0      | 0      | 0    | 0               | 0      | 0                  | 0          | 1       | 0           | 0          |
| 200 | 37       | 0            | 26          | 1                         | 3                                  | 1                           | 1                          | 42           | 0              | 1     | 0   | 0      | 0            | 0              | 1    | 0            | 0              | 0          | 0            | 0               | 0           | 0           | 0      | 0      | 0    | 0               | 0      | 1                  | 0          | 0       | 0           | 0          |
| 201 | 38       | 0            | 26          | 1                         | 1                                  | 0                           | 0                          | 42           | 1              | 0     | 0   | 0      | 0            | 0              | 0    | 1            | 0              | 0          | 0            | 0               | 0           | 0           | 0      | 1      | 0    | 1               | 0      | 0                  | 0          | 0       | 0           | 0          |

|     | A        | B            | C           | D                         | E                                  | F                           | G                          | H            | I              | J     | K   | L      | M            | N              | O    | P            | Q              | R          | S            | T               | U           | V           | W      | X      | Y    | Z               | AA     | AB                 | AC          | AD      | AE          | AF         |
|-----|----------|--------------|-------------|---------------------------|------------------------------------|-----------------------------|----------------------------|--------------|----------------|-------|-----|--------|--------------|----------------|------|--------------|----------------|------------|--------------|-----------------|-------------|-------------|--------|--------|------|-----------------|--------|--------------------|-------------|---------|-------------|------------|
| 1   | Consumer | Gender OF 1M | Age (cont.) | Usual consumer 0 no 1 yes | Freshness 1 not fresh 5 very fresh | will to purchase 0 no 1 yes | will to consume 0 no 1 yes | storage time | Moisten aspect | Slime | Dry | Bright | Cured aspect | Brownish color | Dull | Darker spots | Greenish spots | Wine aroma | garlic aroma | Fermented aroma | Smoke aroma | Cured aroma | Rancid | Sulfur | Mold | Ammoniac/rotten | Butter | Sour/vinegar aroma | Salty taste | Piquant | Sweet taste | Acid taste |
| 202 | 39       | 0            | 44          | 1                         | 5                                  | 1                           | 1                          | 42           | 1              | 0     | 0   | 1      | 0            | 0              | 0    | 0            | 0              | 1          | 0            | 0               | 1           | 1           | 0      | 0      | 0    | 0               | 0      | 0                  | 0           | 0       | 1           | 0          |
| 203 | 40       | 0            | 21          | 1                         | 4                                  | 1                           | 1                          | 42           | 0              | 0     | 1   | 0      | 0            | 0              | 1    | 0            | 0              | 0          | 0            | 1               | 0           | 1           | 0      | 0      | 0    | 0               | 0      | 1                  | 0           | 0       | 0           | 0          |
| 204 | 41       | 0            | 28          | 1                         | 5                                  | 1                           | 1                          | 42           | 0              | 0     | 0   | 1      | 1            | 0              | 0    | 0            | 0              | 0          | 0            | 0               | 0           | 1           | 0      | 0      | 0    | 0               | 0      | 0                  | 0           | 0       | 0           | 0          |
| 205 | 42       | 0            | 24          | 1                         | 4                                  | 1                           | 1                          | 42           | 0              | 0     | 1   | 0      | 1            | 0              | 0    | 1            | 0              | 1          | 1            | 0               | 1           | 0           | 0      | 0      | 1    | 0               | 0      | 1                  | 1           | 0       | 1           | 0          |
| 206 | 43       | 0            | 23          | 1                         | 4                                  | 1                           | 1                          | 42           | 0              | 0     | 0   | 1      | 1            | 0              | 0    | 0            | 0              | 0          | 0            | 0               | 0           | 1           | 0      | 0      | 0    | 0               | 0      | 0                  | 1           | 0       | 0           | 0          |
| 207 | 44       | 1            | 32          | 1                         | 3                                  | 0                           | 1                          | 42           | 0              | 1     | 0   | 0      | 0            | 1              | 0    | 1            | 0              | 0          | 0            | 0               | 0           | 0           | 0      | 0      | 0    | 0               | 0      | 0                  | 1           | 0       | 0           | 0          |
| 208 | 45       | 1            | 55          | 1                         | 5                                  | 1                           | 1                          | 42           | 0              | 0     | 1   | 1      | 1            | 0              | 0    | 0            | 0              | 1          | 1            | 0               | 0           | 0           | 0      | 0      | 0    | 0               | 0      | 0                  | 0           | 0       | 0           | 1          |
| 209 | 46       | 1            | 54          | 1                         | 5                                  | 1                           | 1                          | 42           | 0              | 1     | 0   | 0      | 1            | 0              | 0    | 0            | 0              | 0          | 0            | 0               | 0           | 1           | 0      | 0      | 0    | 0               | 0      | 0                  | 0           | 1       | 0           | 0          |
| 210 | 47       | 0            | 57          | 0                         | 4                                  | 0                           | 1                          | 42           | 1              | 0     | 0   | 0      | 1            | 0              | 0    | 0            | 0              | 0          | 0            | 0               | 0           | 1           | 0      | 0      | 0    | 0               | 0      | 0                  | 0           | 0       | 0           | 0          |
| 211 | 48       | 1            | 42          | 1                         | 4                                  | 0                           | 1                          | 42           | 1              | 0     | 0   | 1      | 0            | 0              | 0    | 0            | 0              | 0          | 0            | 0               | 0           | 1           | 0      | 0      | 0    | 0               | 0      | 0                  | 1           | 0       | 0           | 0          |
| 212 | 49       | 0            | 26          | 1                         | 5                                  | 1                           | 1                          | 42           | 0              | 1     | 0   | 1      | 0            | 0              | 0    | 0            | 0              | 1          | 0            | 0               | 1           | 1           | 0      | 0      | 0    | 0               | 1      | 0                  | 1           | 0       | 1           | 0          |
| 213 | 50       | 0            | 56          | 1                         | 5                                  | 1                           | 1                          | 42           | 1              | 0     | 0   | 0      | 1            | 0              | 0    | 0            | 0              | 1          | 1            | 0               | 0           | 1           | 0      | 0      | 0    | 0               | 0      | 0                  | 1           | 1       | 0           | 0          |
| 214 | 51       | 1            | 29          | 1                         | 4                                  | 1                           | 1                          | 42           | 1              | 0     | 0   | 1      | 0            | 0              | 0    | 1            | 0              | 0          | 1            | 0               | 1           | 0           | 0      | 0      | 0    | 0               | 0      | 0                  | 0           | 0       | 1           | 0          |
| 215 | 52       | 0            | 26          | 1                         | 2                                  | 0                           | 0                          | 42           | 0              | 0     | 1   | 0      | 1            | 0              | 0    | 1            | 0              | 0          | 0            | 0               | 0           | 1           | 0      | 0      | 0    | 0               | 0      | 0                  | 1           | 0       | 0           | 1          |
| 216 | 53       | 0            | 26          | 0                         | 3                                  | 0                           | 0                          | 42           | 1              | 0     | 0   | 1      | 0            | 0              | 0    | 1            | 0              | 1          | 0            | 0               | 1           | 0           | 0      | 0      | 0    | 0               | 0      | 0                  | 1           | 0       | 0           | 0          |
| 217 | 54       | 0            | 60          | 1                         | 5                                  | 1                           | 1                          | 42           | 1              | 0     | 0   | 0      | 1            | 0              | 0    | 0            | 0              | 1          | 0            | 0               | 1           | 1           | 0      | 0      | 0    | 0               | 0      | 0                  | 1           | 0       | 0           | 0          |
| 218 | 55       | 0            | 50          | 1                         | 4                                  | 1                           | 1                          | 42           | 0              | 1     | 0   | 1      | 1            | 0              | 0    | 0            | 0              | 0          | 0            | 0               | 0           | 1           | 0      | 0      | 0    | 0               | 0      | 0                  | 0           | 0       | 0           | 0          |
| 219 | 56       | 0            | 54          | 1                         | 3                                  | 1                           | 1                          | 42           | 0              | 0     | 1   | 0      | 1            | 0              | 1    | 0            | 0              | 1          | 1            | 0               | 1           | 1           | 0      | 0      | 0    | 0               | 0      | 0                  | 1           | 1       | 1           | 1          |
| 220 | 57       | 1            | 38          | 1                         | 1                                  | 0                           | 0                          | 42           | 0              | 0     | 1   | 0      | 0            | 1              | 0    | 1            | 0              | 1          | 1            | 1               | 1           | 1           | 0      | 0      | 0    | 0               | 0      | 1                  | 1           | 0       | 0           | 0          |
| 221 | 58       | 0            | 24          | 1                         | 2                                  | 0                           | 0                          | 42           | 0              | 1     | 0   | 1      | 0            | 0              | 0    | 1            | 0              | 0          | 0            | 0               | 1           | 1           | 0      | 0      | 0    | 0               | 0      | 1                  | 0           | 0       | 0           | 1          |

|     | A        | B            | C           | D                         | E                                  | F                           | G                          | H            | I              | J     | K   | L      | M            | N              | O    | P            | Q              | R          | S            | T               | U           | V           | W      | X      | Y    | Z               | AA     | AB                 | AC         | AD      | AE          | AF         |
|-----|----------|--------------|-------------|---------------------------|------------------------------------|-----------------------------|----------------------------|--------------|----------------|-------|-----|--------|--------------|----------------|------|--------------|----------------|------------|--------------|-----------------|-------------|-------------|--------|--------|------|-----------------|--------|--------------------|------------|---------|-------------|------------|
| 1   | Consumer | Gender OF 1M | Age (cont.) | Usual consumer 0 no 1 yes | Freshness 1 not fresh 5 very fresh | will to purchase 0 no 1 yes | will to consume 0 no 1 yes | storage time | Moisten aspect | Slime | Dry | Bright | Cured aspect | Brownish color | Dull | Darker spots | Greenish spots | Wine aroma | garlic aroma | Fermented aroma | Smoke aroma | Cured aroma | Rancid | Sulfur | Mold | Ammoniac/rotten | Butter | Sour/vinegar aroma | Salty tase | Piquant | Sweet taste | Acid taste |
| 222 | 59       | 0            | 23          | 1                         | 3                                  | 1                           | 1                          | 42           | 1              | 0     | 0   | 1      | 1            | 0              | 0    | 0            | 0              | 1          | 0            | 0               | 0           | 1           | 1      | 0      | 0    | 0               | 0      | 0                  | 1          | 0       | 1           | 1          |
| 223 | 60       | 1            | 22          | 1                         | 4                                  | 1                           | 1                          | 42           | 0              | 0     | 1   | 0      | 0            | 0              | 0    | 1            | 0              | 0          | 0            | 0               | 1           | 1           | 0      | 0      | 0    | 0               | 0      | 0                  | 1          | 0       | 0           | 0          |
| 224 | 61       | 1            | 35          | 1                         | 4                                  | 1                           | 1                          | 42           | 0              | 0     | 1   | 1      | 1            | 0              | 0    | 0            | 0              | 0          | 0            | 0               | 0           | 1           | 0      | 0      | 0    | 0               | 0      | 0                  | 0          | 0       | 0           | 0          |
| 225 | 62       | 1            | 58          | 1                         | 4                                  | 1                           | 1                          | 42           | 0              | 0     | 1   | 0      | 1            | 0              | 0    | 0            | 0              | 1          | 0            | 0               | 0           | 0           | 0      | 0      | 0    | 0               | 0      | 1                  | 1          | 0       | 0           | 0          |
| 226 | 63       | 0            | 26          | 1                         | 3                                  | 1                           | 1                          | 42           | 0              | 0     | 1   | 0      | 1            | 0              | 0    | 0            | 0              | 0          | 0            | 0               | 1           | 0           | 1      | 0      | 0    | 0               | 0      | 0                  | 0          | 0       | 0           | 0          |
| 227 | 64       | 0            | 56          | 1                         | 4                                  | 1                           | 1                          | 42           | 1              | 0     | 0   | 1      | 0            | 0              | 0    | 0            | 0              | 0          | 1            | 0               | 0           | 0           | 0      | 0      | 0    | 0               | 0      | 0                  | 0          | 1       | 0           | 0          |
| 228 | 65       | 0            | 33          | 1                         | 3                                  | 0                           | 0                          | 42           | 0              | 0     | 1   | 0      | 1            | 0              | 1    | 0            | 0              | 0          | 0            | 0               | 1           | 1           | 0      | 0      | 0    | 0               | 0      | 0                  | 1          | 0       | 0           | 1          |
| 229 | 66       | 0            | 54          | 1                         | 3                                  | 1                           | 1                          | 42           | 0              | 0     | 1   | 0      | 1            | 0              | 1    | 0            | 0              | 0          | 0            | 0               | 1           | 1           | 0      | 0      | 0    | 0               | 0      | 0                  | 0          | 0       | 1           | 0          |
| 230 | 67       | 1            | 25          | 1                         | 3                                  | 0                           | 0                          | 42           | 0              | 0     | 1   | 0      | 1            | 0              | 0    | 0            | 0              | 1          | 0            | 0               | 0           | 0           | 0      | 0      | 0    | 0               | 0      | 0                  | 1          | 0       | 0           | 0          |
| 231 | 68       | 1            | 25          | 1                         | 5                                  | 1                           | 1                          | 42           | 1              | 1     | 0   | 1      | 1            | 1              | 0    | 0            | 0              | 1          | 0            | 0               | 0           | 1           | 0      | 0      | 0    | 0               | 0      | 0                  | 1          | 0       | 0           | 0          |
| 232 | 69       | 1            | 29          | 1                         | 4                                  | 1                           | 1                          | 42           | 0              | 0     | 1   | 0      | 0            | 0              | 0    | 0            | 0              | 0          | 0            | 0               | 0           | 1           | 0      | 0      | 0    | 0               | 0      | 0                  | 0          | 0       | 0           | 0          |
| 233 | 70       | 1            | 56          | 1                         | 2                                  | 0                           | 0                          | 42           | 0              | 0     | 0   | 0      | 0            | 0              | 0    | 1            | 0              | 0          | 0            | 1               | 0           | 0           | 0      | 0      | 0    | 0               | 0      | 0                  | 1          | 0       | 0           | 0          |
| 234 | 71       | 1            | 50          | 1                         | 4                                  | 1                           | 1                          | 42           | 0              | 0     | 1   | 0      | 1            | 0              | 0    | 0            | 0              | 1          | 1            | 1               | 0           | 1           | 0      | 0      | 0    | 0               | 0      | 0                  | 1          | 0       | 0           | 1          |
| 235 | 72       | 0            | 57          | 1                         | 4                                  | 1                           | 1                          | 42           | 1              | 0     | 0   | 0      | 1            | 0              | 0    | 0            | 0              | 1          | 0            | 0               | 0           | 0           | 0      | 0      | 0    | 0               | 0      | 0                  | 1          | 0       | 0           | 0          |
| 236 | 73       | 1            | 22          | 1                         | 4                                  | 1                           | 1                          | 42           | 0              | 0     | 1   | 0      | 1            | 0              | 1    | 0            | 0              | 0          | 1            | 0               | 1           | 1           | 0      | 0      | 0    | 0               | 0      | 0                  | 1          | 0       | 0           | 0          |
| 237 | 74       | 1            | 55          | 1                         | 5                                  | 1                           | 1                          | 42           | 0              | 0     | 1   | 0      | 1            | 0              | 0    | 1            | 0              | 1          | 0            | 0               | 0           | 1           | 0      | 0      | 0    | 0               | 0      | 0                  | 0          | 0       | 1           | 0          |
| 238 | 75       | 0            | 26          | 1                         | 4                                  | 1                           | 1                          | 42           | 1              | 0     | 0   | 1      | 1            | 0              | 0    | 0            | 0              | 0          | 0            | 0               | 1           | 1           | 0      | 0      | 0    | 0               | 0      | 0                  | 1          | 0       | 0           | 0          |
| 239 | 76       | 0            | 53          | 1                         | 4                                  | 1                           | 1                          | 42           | 0              | 0     | 1   | 0      | 1            | 0              | 1    | 0            | 0              | 0          | 1            | 0               | 1           | 0           | 0      | 0      | 0    | 0               | 0      | 0                  | 1          | 0       | 0           | 0          |
| 240 | 77       | 1            | 53          | 1                         | 4                                  | 1                           | 1                          | 42           | 0              | 0     | 1   | 1      | 0            | 0              | 0    | 0            | 0              | 1          | 0            | 0               | 0           | 0           | 0      | 0      | 0    | 0               | 0      | 0                  | 1          | 0       | 0           | 0          |
| 241 | 78       | 1            | 58          | 1                         | 4                                  | 1                           | 1                          | 42           | 0              | 0     | 1   | 0      | 1            | 0              | 0    | 0            | 0              | 0          | 0            | 0               | 1           | 0           | 0      | 0      | 0    | 0               | 0      | 0                  | 1          | 0       | 0           | 0          |

|     | A        | B            | C           | D                         | E                                  | F                           | G                          | H            | I              | J     | K   | L      | M            | N              | O    | P            | Q              | R          | S            | T               | U           | V           | W      | X      | Y    | Z               | AA     | AB                 | AC          | AD      | AE          | AF         |
|-----|----------|--------------|-------------|---------------------------|------------------------------------|-----------------------------|----------------------------|--------------|----------------|-------|-----|--------|--------------|----------------|------|--------------|----------------|------------|--------------|-----------------|-------------|-------------|--------|--------|------|-----------------|--------|--------------------|-------------|---------|-------------|------------|
| 1   | Consumer | Gender OF 1M | Age (cont.) | Usual consumer 0 no 1 yes | Freshness 1 not fresh 5 very fresh | will to purchase 0 no 1 yes | will to consume 0 no 1 yes | storage time | Moisten aspect | Slime | Dry | Bright | Cured aspect | Brownish color | Dull | Darker spots | Greenish spots | Wine aroma | garlic aroma | Fermented aroma | Smoke aroma | Cured aroma | Rancid | Sulfur | Mold | Ammoniac/rotten | Butter | Sour/vinegar aroma | Salty taste | Piquant | Sweet taste | Acid taste |
| 242 | 79       | 0            | 60          | 1                         | 5                                  | 0                           | 1                          | 42           | 1              | 0     | 0   | 0      | 1            | 0              | 0    | 0            | 0              | 1          | 1            | 0               | 0           | 0           | 0      | 0      | 0    | 0               | 0      | 0                  | 1           | 0       | 0           | 0          |
| 243 | 80       | 1            | 26          | 1                         | 2                                  | 1                           | 1                          | 42           | 0              | 0     | 1   | 0      | 0            | 0              | 0    | 1            | 0              | 0          | 0            | 0               | 0           | 1           | 0      | 0      | 0    | 0               | 0      | 0                  | 0           | 0       | 0           | 0          |
| 244 | 81       | 0            | 27          | 1                         | 4                                  | 1                           | 1                          | 42           | 0              | 1     | 0   | 0      | 0            | 0              | 1    | 0            | 0              | 1          | 0            | 0               | 0           | 0           | 0      | 0      | 0    | 0               | 0      | 0                  | 1           | 0       | 0           | 0          |
| 245 | 1        | 1            | 24          | 1                         | 4                                  | 1                           | 1                          | 63           | 0              | 0     | 1   | 0      | 0            | 0              | 1    | 0            | 0              | 1          | 0            | 0               | 1           | 1           | 0      | 0      | 0    | 0               | 0      | 0                  | 1           | 1       | 1           | 0          |
| 246 | 2        | 0            | 23          | 1                         | 1                                  | 0                           | 0                          | 63           | 1              | 0     | 0   | 1      | 0            | 0              | 0    | 0            | 0              | 1          | 0            | 0               | 0           | 0           | 1      | 0      | 0    | 0               | 0      | 1                  | 0           | 0       | 0           | 1          |
| 247 | 3        | 1            | 53          | 1                         | 4                                  | 1                           | 1                          | 63           | 1              | 0     | 0   | 0      | 0            | 0              | 1    | 0            | 0              | 1          | 0            | 0               | 1           | 0           | 0      | 0      | 0    | 0               | 0      | 0                  | 0           | 0       | 0           | 0          |
| 248 | 4        | 0            | 52          | 1                         | 3                                  | 1                           | 1                          | 63           | 0              | 0     | 1   | 0      | 0            | 0              | 1    | 0            | 0              | 0          | 1            | 0               | 1           | 0           | 0      | 0      | 0    | 0               | 0      | 0                  | 1           | 0       | 0           | 1          |
| 249 | 5        | 0            | 23          | 1                         | 2                                  | 0                           | 1                          | 63           | 1              | 0     | 0   | 1      | 0            | 0              | 0    | 0            | 0              | 1          | 1            | 0               | 0           | 0           | 0      | 0      | 0    | 0               | 0      | 1                  | 0           | 0       | 0           | 0          |
| 250 | 6        | 0            | 23          | 1                         | 2                                  | 1                           | 1                          | 63           | 1              | 0     | 0   | 1      | 0            | 0              | 0    | 0            | 0              | 1          | 0            | 0               | 0           | 0           | 0      | 0      | 0    | 0               | 0      | 1                  | 1           | 0       | 0           | 1          |
| 251 | 7        | 1            | 55          | 1                         | 3                                  | 1                           | 1                          | 63           | 1              | 0     | 0   | 1      | 1            | 0              | 0    | 0            | 0              | 1          | 1            | 0               | 1           | 1           | 0      | 0      | 0    | 0               | 0      | 0                  | 1           | 0       | 0           | 1          |
| 252 | 8        | 0            | 54          | 1                         | 3                                  | 1                           | 1                          | 63           | 1              | 0     | 0   | 1      | 1            | 0              | 0    | 0            | 0              | 1          | 0            | 0               | 0           | 1           | 0      | 0      | 0    | 0               | 0      | 0                  | 1           | 0       | 0           | 0          |
| 253 | 9        | 1            | 21          | 1                         | 4                                  | 1                           | 1                          | 63           | 0              | 0     | 1   | 1      | 0            | 0              | 0    | 0            | 0              | 1          | 0            | 0               | 1           | 1           | 0      | 0      | 0    | 0               | 0      | 0                  | 1           | 0       | 0           | 0          |
| 254 | 10       | 1            | 55          | 1                         | 4                                  | 1                           | 1                          | 63           | 0              | 1     | 0   | 0      | 1            | 0              | 0    | 0            | 0              | 1          | 0            | 0               | 1           | 1           | 0      | 0      | 0    | 0               | 0      | 0                  | 0           | 0       | 0           | 1          |
| 255 | 11       | 0            | 23          | 0                         | 4                                  | 1                           | 1                          | 63           | 1              | 0     | 0   | 1      | 1            | 0              | 0    | 0            | 0              | 1          | 1            | 0               | 1           | 1           | 0      | 0      | 0    | 0               | 0      | 1                  | 1           | 0       | 0           | 1          |
| 256 | 12       | 0            | 52          | 1                         | 5                                  | 1                           | 1                          | 63           | 0              | 0     | 1   | 1      | 0            | 0              | 0    | 0            | 0              | 1          | 1            | 0               | 1           | 0           | 0      | 0      | 0    | 0               | 0      | 0                  | 1           | 0       | 0           | 0          |
| 257 | 13       | 1            | 50          | 0                         | 4                                  | 1                           | 1                          | 63           | 0              | 0     | 1   | 0      | 1            | 0              | 0    | 0            | 0              | 1          | 0            | 0               | 1           | 1           | 0      | 0      | 0    | 0               | 0      | 0                  | 1           | 0       | 0           | 0          |
| 258 | 14       | 1            | 85          | 1                         | 4                                  | 1                           | 1                          | 63           | 0              | 0     | 1   | 1      | 1            | 0              | 0    | 0            | 0              | 1          | 0            | 0               | 0           | 1           | 0      | 0      | 0    | 0               | 0      | 0                  | 0           | 0       | 0           | 0          |
| 259 | 15       | 1            | 60          | 0                         | 3                                  | 1                           | 0                          | 63           | 0              | 0     | 1   | 0      | 1            | 0              | 0    | 0            | 0              | 0          | 0            | 0               | 1           | 0           | 0      | 0      | 0    | 0               | 0      | 0                  | 1           | 0       | 0           | 0          |
| 260 | 16       | 0            | 58          | 1                         | 3                                  | 0                           | 1                          | 63           | 0              | 0     | 1   | 1      | 1            | 0              | 0    | 0            | 0              | 0          | 0            | 0               | 1           | 1           | 0      | 0      | 0    | 0               | 0      | 0                  | 0           | 0       | 0           | 1          |
| 261 | 17       | 1            | 30          | 1                         | 5                                  | 1                           | 1                          | 63           | 0              | 0     | 1   | 1      | 1            | 0              | 0    | 0            | 0              | 0          | 1            | 0               | 0           | 1           | 0      | 0      | 0    | 0               | 0      | 0                  | 1           | 0       | 0           | 0          |

|     | A        | B            | C           | D                         | E                                  | F                           | G                          | H            | I              | J     | K   | L      | M            | N              | O    | P            | Q              | R          | S            | T               | U           | V           | W      | X      | Y    | Z               | AA     | AB                 | AC          | AD      | AE          | AF         |
|-----|----------|--------------|-------------|---------------------------|------------------------------------|-----------------------------|----------------------------|--------------|----------------|-------|-----|--------|--------------|----------------|------|--------------|----------------|------------|--------------|-----------------|-------------|-------------|--------|--------|------|-----------------|--------|--------------------|-------------|---------|-------------|------------|
| 1   | Consumer | Gender OF 1M | Age (cont.) | Usual consumer 0 no 1 yes | Freshness 1 not fresh 5 very fresh | will to purchase 0 no 1 yes | will to consume 0 no 1 yes | storage time | Moisten aspect | Slime | Dry | Bright | Cured aspect | Brownish color | Dull | Darker spots | Greenish spots | Wine aroma | garlic aroma | Fermented aroma | Smoke aroma | Cured aroma | Rancid | Sulfur | Mold | Ammoniac/rotten | Butter | Sour/vinegar aroma | Salty taste | Piquant | Sweet taste | Acid taste |
| 262 | 18       | 0            | 59          | 1                         | 5                                  | 1                           | 1                          | 63           | 0              | 0     | 1   | 0      | 1            | 0              | 0    | 0            | 0              | 1          | 1            | 0               | 0           | 1           | 0      | 0      | 0    | 0               | 0      | 0                  | 1           | 0       | 0           | 0          |
| 263 | 19       | 0            | 23          | 1                         | 3                                  | 1                           | 1                          | 63           | 0              | 0     | 1   | 0      | 0            | 0              | 1    | 0            | 0              | 0          | 0            | 0               | 0           | 1           | 0      | 0      | 0    | 0               | 0      | 0                  | 0           | 0       | 0           | 1          |
| 264 | 20       | 0            | 22          | 0                         | 2                                  | 0                           | 0                          | 63           | 0              | 0     | 1   | 0      | 1            | 0              | 1    | 0            | 0              | 0          | 0            | 0               | 1           | 1           | 0      | 0      | 0    | 0               | 0      | 1                  | 1           | 0       | 0           | 0          |
| 265 | 21       | 0            | 23          | 1                         | 5                                  | 1                           | 1                          | 63           | 0              | 0     | 1   | 0      | 1            | 0              | 0    | 0            | 0              | 1          | 1            | 0               | 1           | 1           | 0      | 0      | 0    | 0               | 0      | 0                  | 1           | 0       | 0           | 0          |
| 266 | 22       | 0            | 28          | 1                         | 4                                  | 1                           | 1                          | 63           | 0              | 0     | 1   | 0      | 1            | 0              | 0    | 0            | 0              | 0          | 0            | 0               | 1           | 0           | 0      | 0      | 0    | 0               | 0      | 1                  | 0           | 0       | 0           | 0          |
| 267 | 23       | 1            | 23          | 1                         | 4                                  | 1                           | 1                          | 63           | 1              | 0     | 0   | 0      | 1            | 0              | 0    | 0            | 0              | 1          | 1            | 0               | 0           | 1           | 0      | 0      | 0    | 0               | 0      | 0                  | 1           | 0       | 0           | 0          |
| 268 | 24       | 1            | 39          | 1                         | 3                                  | 1                           | 1                          | 63           | 1              | 0     | 0   | 1      | 1            | 0              | 1    | 0            | 0              | 1          | 1            | 1               | 0           | 1           | 0      | 0      | 0    | 0               | 0      | 0                  | 1           | 0       | 0           | 0          |
| 269 | 25       | 0            | 26          | 1                         | 4                                  | 1                           | 1                          | 63           | 1              | 0     | 0   | 0      | 1            | 0              | 0    | 0            | 0              | 1          | 1            | 0               | 0           | 1           | 0      | 0      | 0    | 0               | 0      | 0                  | 1           | 0       | 0           | 1          |
| 270 | 26       | 0            | 27          | 1                         | 4                                  | 1                           | 1                          | 63           | 0              | 0     | 1   | 1      | 0            | 0              | 0    | 1            | 0              | 1          | 1            | 0               | 1           | 1           | 0      | 0      | 0    | 0               | 0      | 0                  | 1           | 1       | 0           | 1          |
| 271 | 27       | 0            | 36          | 1                         | 4                                  | 1                           | 1                          | 63           | 1              | 0     | 0   | 1      | 1            | 0              | 0    | 0            | 0              | 1          | 1            | 0               | 0           | 1           | 0      | 0      | 0    | 0               | 0      | 0                  | 0           | 0       | 0           | 0          |
| 272 | 28       | 1            | 49          | 1                         | 4                                  | 1                           | 1                          | 63           | 1              | 0     | 0   | 1      | 1            | 1              | 0    | 0            | 0              | 1          | 1            | 0               | 0           | 0           | 0      | 0      | 0    | 0               | 0      | 0                  | 0           | 0       | 0           | 0          |
| 273 | 29       | 1            | 23          | 0                         | 4                                  | 1                           | 1                          | 63           | 0              | 1     | 1   | 0      | 1            | 0              | 1    | 0            | 0              | 0          | 0            | 0               | 0           | 1           | 0      | 0      | 0    | 0               | 0      | 0                  | 0           | 0       | 0           | 1          |
| 274 | 30       | 0            | 46          | 1                         | 4                                  | 1                           | 1                          | 63           | 0              | 0     | 1   | 0      | 0            | 0              | 1    | 0            | 0              | 1          | 0            | 0               | 1           | 1           | 0      | 0      | 0    | 0               | 0      | 0                  | 1           | 0       | 0           | 0          |
| 275 | 31       | 1            | 47          | 1                         | 4                                  | 1                           | 1                          | 63           | 0              | 1     | 0   | 0      | 1            | 0              | 0    | 0            | 0              | 1          | 0            | 0               | 0           | 1           | 0      | 0      | 0    | 0               | 0      | 0                  | 0           | 1       | 0           | 0          |
| 276 | 32       | 0            | 53          | 1                         | 5                                  | 1                           | 1                          | 63           | 0              | 0     | 1   | 0      | 1            | 0              | 1    | 0            | 0              | 1          | 1            | 0               | 0           | 1           | 0      | 0      | 0    | 0               | 0      | 0                  | 0           | 1       | 0           | 0          |
| 277 | 33       | 0            | 48          | 1                         | 4                                  | 0                           | 1                          | 63           | 0              | 0     | 1   | 0      | 1            | 0              | 1    | 0            | 0              | 1          | 0            | 0               | 1           | 1           | 0      | 0      | 0    | 0               | 0      | 0                  | 0           | 0       | 0           | 0          |
| 278 | 34       | 1            | 52          | 1                         | 5                                  | 1                           | 1                          | 63           | 0              | 0     | 0   | 0      | 0            | 0              | 0    | 0            | 0              | 1          | 0            | 0               | 1           | 1           | 0      | 0      | 0    | 0               | 0      | 0                  | 0           | 0       | 0           | 0          |
| 279 | 35       | 0            | 23          | 1                         | 4                                  | 1                           | 1                          | 63           | 0              | 0     | 1   | 1      | 1            | 0              | 0    | 0            | 0              | 1          | 0            | 0               | 1           | 1           | 0      | 0      | 0    | 0               | 0      | 0                  | 1           | 0       | 0           | 0          |
| 280 | 36       | 0            | 44          | 0                         | 5                                  | 1                           | 1                          | 63           | 0              | 0     | 1   | 0      | 1            | 0              | 0    | 0            | 0              | 0          | 0            | 0               | 0           | 1           | 0      | 0      | 0    | 0               | 0      | 0                  | 0           | 0       | 1           | 0          |
| 281 | 37       | 0            | 26          | 1                         | 3                                  | 0                           | 0                          | 63           | 0              | 0     | 1   | 0      | 0            | 0              | 1    | 0            | 0              | 0          | 0            | 0               | 0           | 0           | 0      | 0      | 0    | 0               | 0      | 1                  | 0           | 0       | 0           | 0          |

|     | A        | B            | C           | D                         | E                                  | F                           | G                          | H            | I              | J     | K   | L      | M            | N              | O    | P            | Q              | R          | S            | T               | U           | V           | W      | X      | Y    | Z               | AA     | AB                 | AC          | AD      | AE          | AF         |
|-----|----------|--------------|-------------|---------------------------|------------------------------------|-----------------------------|----------------------------|--------------|----------------|-------|-----|--------|--------------|----------------|------|--------------|----------------|------------|--------------|-----------------|-------------|-------------|--------|--------|------|-----------------|--------|--------------------|-------------|---------|-------------|------------|
| 1   | Consumer | Gender OF 1M | Age (cont.) | Usual consumer 0 no 1 yes | Freshness 1 not fresh 5 very fresh | will to purchase 0 no 1 yes | will to consume 0 no 1 yes | storage time | Moisten aspect | Slime | Dry | Bright | Cured aspect | Brownish color | Dull | Darker spots | Greenish spots | Wine aroma | garlic aroma | Fermented aroma | Smoke aroma | Cured aroma | Rancid | Sulfur | Mold | Ammoniac/rotten | Butter | Sour/vinegar aroma | Salty taste | Piquant | Sweet taste | Acid taste |
| 282 | 38       | 0            | 26          | 1                         | 4                                  | 1                           | 1                          | 63           | 1              | 0     | 0   | 0      | 1            | 0              | 0    | 0            | 0              | 0          | 1            | 0               | 1           | 1           | 0      | 0      | 0    | 0               | 0      | 0                  | 0           | 0       | 0           | 0          |
| 283 | 39       | 0            | 44          | 1                         | 5                                  | 0                           | 1                          | 63           | 0              | 0     | 1   | 0      | 1            | 0              | 1    | 0            | 0              | 1          | 0            | 0               | 0           | 1           | 0      | 0      | 0    | 0               | 0      | 0                  | 1           | 0       | 0           | 0          |
| 284 | 40       | 0            | 21          | 1                         | 4                                  | 1                           | 1                          | 63           | 0              | 0     | 1   | 0      | 1            | 0              | 0    | 0            | 0              | 0          | 1            | 0               | 0           | 1           | 0      | 0      | 0    | 0               | 0      | 0                  | 0           | 0       | 1           | 0          |
| 285 | 41       | 0            | 28          | 1                         | 4                                  | 1                           | 1                          | 63           | 0              | 0     | 0   | 0      | 1            | 0              | 1    | 0            | 0              | 0          | 0            | 0               | 0           | 1           | 0      | 0      | 0    | 0               | 0      | 0                  | 0           | 1       | 1           | 0          |
| 286 | 42       | 0            | 24          | 1                         | 3                                  | 0                           | 0                          | 63           | 0              | 0     | 1   | 0      | 1            | 0              | 1    | 1            | 0              | 1          | 1            | 0               | 1           | 1           | 0      | 0      | 0    | 0               | 0      | 0                  | 1           | 0       | 1           | 0          |
| 287 | 43       | 0            | 23          | 1                         | 4                                  | 1                           | 1                          | 63           | 1              | 0     | 0   | 0      | 1            | 0              | 0    | 0            | 0              | 0          | 0            | 0               | 0           | 0           | 0      | 0      | 0    | 0               | 0      | 0                  | 1           | 0       | 0           | 0          |
| 288 | 44       | 1            | 32          | 1                         | 2                                  | 0                           | 0                          | 63           | 0              | 0     | 1   | 0      | 0            | 1              | 0    | 1            | 0              | 0          | 0            | 0               | 0           | 0           | 0      | 0      | 0    | 0               | 0      | 0                  | 1           | 0       | 0           | 0          |
| 289 | 45       | 1            | 55          | 1                         | 5                                  | 1                           | 1                          | 63           | 0              | 0     | 1   | 0      | 1            | 0              | 0    | 0            | 0              | 1          | 0            | 0               | 0           | 1           | 0      | 0      | 0    | 0               | 0      | 0                  | 1           | 0       | 0           | 1          |
| 290 | 46       | 1            | 54          | 1                         | 4                                  | 0                           | 0                          | 63           | 0              | 1     | 0   | 0      | 1            | 0              | 0    | 0            | 0              | 1          | 0            | 0               | 0           | 0           | 0      | 0      | 0    | 0               | 1      | 0                  | 0           | 0       | 0           | 0          |
| 291 | 47       | 0            | 57          | 0                         | 3                                  | 0                           | 0                          | 63           | 0              | 0     | 1   | 0      | 1            | 0              | 0    | 0            | 0              | 0          | 0            | 0               | 0           | 1           | 0      | 0      | 0    | 0               | 0      | 1                  | 0           | 0       | 0           | 0          |
| 292 | 48       | 1            | 42          | 1                         | 2                                  | 0                           | 0                          | 63           | 0              | 0     | 1   | 0      | 1            | 0              | 0    | 0            | 0              | 0          | 0            | 0               | 0           | 1           | 0      | 0      | 0    | 0               | 0      | 0                  | 0           | 0       | 0           | 0          |
| 293 | 49       | 0            | 26          | 1                         | 4                                  | 1                           | 1                          | 63           | 0              | 1     | 0   | 1      | 1            | 0              | 0    | 0            | 0              | 1          | 1            | 0               | 0           | 1           | 0      | 0      | 0    | 0               | 0      | 0                  | 1           | 0       | 1           | 1          |
| 294 | 50       | 0            | 56          | 1                         | 5                                  | 1                           | 1                          | 63           | 1              | 0     | 0   | 0      | 1            | 0              | 0    | 0            | 0              | 1          | 1            | 0               | 0           | 1           | 0      | 0      | 0    | 0               | 0      | 0                  | 0           | 0       | 0           | 0          |
| 295 | 51       | 1            | 29          | 1                         | 4                                  | 1                           | 1                          | 63           | 0              | 0     | 1   | 0      | 1            | 0              | 1    | 0            | 0              | 1          | 1            | 0               | 0           | 1           | 0      | 0      | 0    | 0               | 0      | 0                  | 1           | 0       | 0           | 0          |
| 296 | 52       | 0            | 26          | 1                         | 4                                  | 1                           | 1                          | 63           | 0              | 0     | 1   | 0      | 0            | 0              | 1    | 1            | 0              | 0          | 1            | 0               | 1           | 0           | 0      | 0      | 0    | 0               | 0      | 0                  | 1           | 0       | 0           | 0          |
| 297 | 53       | 0            | 26          | 0                         | 3                                  | 0                           | 0                          | 63           | 0              | 0     | 1   | 0      | 1            | 0              | 0    | 1            | 0              | 0          | 0            | 0               | 0           | 1           | 0      | 0      | 0    | 0               | 0      | 0                  | 0           | 0       | 0           | 0          |
| 298 | 54       | 0            | 60          | 1                         | 3                                  | 0                           | 0                          | 63           | 1              | 0     | 0   | 1      | 0            | 1              | 0    | 0            | 0              | 1          | 1            | 0               | 0           | 1           | 0      | 0      | 0    | 0               | 0      | 0                  | 1           | 0       | 0           | 0          |
| 299 | 55       | 0            | 50          | 1                         | 5                                  | 1                           | 1                          | 63           | 0              | 0     | 1   | 0      | 1            | 0              | 0    | 0            | 0              | 1          | 0            | 0               | 1           | 1           | 0      | 0      | 0    | 0               | 0      | 0                  | 1           | 0       | 0           | 0          |
| 300 | 56       | 0            | 54          | 1                         | 4                                  | 1                           | 1                          | 63           | 0              | 1     | 0   | 0      | 1            | 0              | 1    | 0            | 0              | 0          | 0            | 0               | 0           | 1           | 0      | 0      | 0    | 0               | 0      | 0                  | 0           | 0       | 0           | 0          |
| 301 | 57       | 1            | 38          | 1                         | 3                                  | 1                           | 1                          | 63           | 0              | 0     | 1   | 0      | 1            | 0              | 1    | 0            | 0              | 1          | 1            | 0               | 1           | 1           | 0      | 0      | 0    | 0               | 0      | 0                  | 1           | 0       | 1           | 1          |



|     | A        | B            | C           | D                         | E                                  | F                           | G                          | H            | I              | J     | K   | L      | M            | N              | O    | P            | Q              | R          | S            | T               | U           | V           | W      | X      | Y    | Z               | AA     | AB                 | AC          | AD      | AE          | AF         |
|-----|----------|--------------|-------------|---------------------------|------------------------------------|-----------------------------|----------------------------|--------------|----------------|-------|-----|--------|--------------|----------------|------|--------------|----------------|------------|--------------|-----------------|-------------|-------------|--------|--------|------|-----------------|--------|--------------------|-------------|---------|-------------|------------|
| 1   | Consumer | Gender OF 1M | Age (cont.) | Usual consumer 0 no 1 yes | Freshness 1 not fresh 5 very fresh | will to purchase 0 no 1 yes | will to consume 0 no 1 yes | storage time | Moisten aspect | Slime | Dry | Bright | Cured aspect | Brownish color | Dull | Darker spots | Greenish spots | Wine aroma | garlic aroma | Fermented aroma | Smoke aroma | Cured aroma | Rancid | Sulfur | Mold | Ammoniac/rotten | Butter | Sour/vinegar aroma | Salty taste | Piquant | Sweet taste | Acid taste |
| 322 | 78       | 1            | 58          | 1                         | 4                                  | 1                           | 1                          | 63           | 0              | 0     | 1   | 0      | 0            | 0              | 0    | 1            | 0              | 0          | 0            | 0               | 1           | 0           | 0      | 0      | 0    | 0               | 0      | 0                  | 0           | 0       | 0           | 0          |
| 323 | 79       | 0            | 60          | 1                         | 4                                  | 1                           | 1                          | 63           | 0              | 0     | 0   | 0      | 0            | 0              | 0    | 1            | 0              | 1          | 0            | 0               | 0           | 0           | 0      | 0      | 0    | 0               | 0      | 0                  | 1           | 0       | 0           | 0          |
| 324 | 80       | 1            | 26          | 1                         | 5                                  | 0                           | 0                          | 63           | 0              | 0     | 1   | 0      | 1            | 0              | 0    | 0            | 0              | 1          | 0            | 0               | 0           | 0           | 0      | 0      | 0    | 0               | 0      | 0                  | 1           | 0       | 0           | 0          |
| 325 | 81       | 0            | 27          | 1                         | 3                                  | 1                           | 1                          | 63           | 0              | 1     | 0   | 0      | 1            | 0              | 0    | 0            | 0              | 0          | 0            | 0               | 0           | 1           | 0      | 0      | 0    | 0               | 0      | 0                  | 0           | 0       | 0           | 0          |
| 326 | 1        | 1            | 24          | 1                         | 2                                  | 0                           | 0                          | 84           | 1              | 0     | 0   | 0      | 0            | 1              | 0    | 1            | 0              | 1          | 1            | 0               | 1           | 1           | 0      | 0      | 0    | 0               | 0      | 0                  | 1           | 1       | 0           | 0          |
| 327 | 2        | 0            | 23          | 1                         | 5                                  | 0                           | 1                          | 84           | 0              | 0     | 1   | 0      | 1            | 0              | 0    | 0            | 0              | 1          | 1            | 0               | 0           | 0           | 0      | 0      | 0    | 0               | 0      | 0                  | 1           | 0       | 1           | 0          |
| 328 | 3        | 1            | 53          | 1                         | 5                                  | 1                           | 1                          | 84           | 1              | 0     | 0   | 1      | 1            | 0              | 0    | 0            | 0              | 0          | 1            | 0               | 1           | 1           | 0      | 0      | 0    | 0               | 0      | 0                  | 1           | 1       | 0           | 0          |
| 329 | 4        | 0            | 52          | 1                         | 4                                  | 1                           | 1                          | 84           | 0              | 1     | 0   | 0      | 0            | 0              | 0    | 0            | 0              | 0          | 0            | 0               | 1           | 1           | 0      | 0      | 0    | 0               | 0      | 0                  | 0           | 0       | 0           | 0          |
| 330 | 5        | 0            | 23          | 1                         | 1                                  | 0                           | 0                          | 84           | 1              | 1     | 0   | 1      | 1            | 0              | 1    | 0            | 0              | 0          | 0            | 0               | 0           | 0           | 0      | 0      | 0    | 0               | 0      | 0                  | 1           | 0       | 0           | 1          |
| 331 | 6        | 0            | 23          | 1                         | 4                                  | 1                           | 1                          | 84           | 0              | 0     | 1   | 1      | 1            | 0              | 0    | 0            | 0              | 1          | 1            | 0               | 0           | 1           | 0      | 0      | 0    | 0               | 0      | 0                  | 1           | 0       | 0           | 1          |
| 332 | 7        | 1            | 55          | 1                         | 5                                  | 0                           | 0                          | 84           | 1              | 0     | 0   | 0      | 1            | 0              | 0    | 0            | 0              | 1          | 1            | 0               | 0           | 0           | 0      | 0      | 0    | 0               | 0      | 0                  | 1           | 0       | 0           | 0          |
| 333 | 8        | 0            | 54          | 1                         | 4                                  | 1                           | 1                          | 84           | 0              | 0     | 1   | 0      | 0            | 1              | 0    | 0            | 0              | 0          | 1            | 0               | 0           | 0           | 0      | 0      | 0    | 0               | 0      | 0                  | 1           | 0       | 0           | 0          |
| 334 | 9        | 1            | 21          | 1                         | 5                                  | 1                           | 1                          | 84           | 0              | 1     | 0   | 0      | 1            | 0              | 0    | 0            | 0              | 1          | 0            | 0               | 0           | 0           | 0      | 0      | 0    | 0               | 0      | 0                  | 0           | 0       | 0           | 0          |
| 335 | 10       | 1            | 55          | 1                         | 4                                  | 1                           | 1                          | 84           | 0              | 0     | 1   | 0      | 1            | 0              | 0    | 0            | 0              | 1          | 0            | 0               | 0           | 1           | 0      | 0      | 0    | 0               | 0      | 0                  | 0           | 0       | 0           | 0          |
| 336 | 11       | 0            | 23          | 0                         | 4                                  | 1                           | 1                          | 84           | 1              | 0     | 0   | 1      | 0            | 0              | 0    | 0            | 0              | 0          | 0            | 0               | 1           | 1           | 0      | 0      | 0    | 0               | 0      | 0                  | 0           | 0       | 1           | 0          |
| 337 | 12       | 0            | 52          | 1                         | 3                                  | 0                           | 1                          | 84           | 0              | 0     | 1   | 0      | 0            | 0              | 1    | 1            | 0              | 0          | 0            | 1               | 0           | 0           | 0      | 0      | 0    | 0               | 0      | 1                  | 0           | 0       | 0           | 0          |
| 338 | 13       | 1            | 50          | 0                         | 3                                  | 1                           | 1                          | 84           | 0              | 0     | 1   | 0      | 0            | 1              | 1    | 0            | 0              | 1          | 0            | 0               | 0           | 1           | 0      | 0      | 0    | 0               | 0      | 0                  | 0           | 0       | 0           | 0          |
| 339 | 14       | 1            | 85          | 1                         | 3                                  | 1                           | 1                          | 84           | 0              | 0     | 1   | 0      | 1            | 0              | 0    | 0            | 0              | 0          | 1            | 0               | 1           | 1           | 0      | 0      | 0    | 0               | 0      | 0                  | 1           | 0       | 0           | 0          |
| 340 | 15       | 1            | 60          | 0                         | 4                                  | 1                           | 1                          | 84           | 1              | 0     | 0   | 0      | 1            | 0              | 0    | 0            | 0              | 1          | 0            | 0               | 0           | 0           | 0      | 0      | 0    | 0               | 0      | 0                  | 1           | 0       | 0           | 0          |
| 341 | 16       | 0            | 58          | 1                         | 4                                  | 1                           | 1                          | 84           | 0              | 0     | 1   | 0      | 1            | 0              | 0    | 0            | 0              | 1          | 1            | 1               | 1           | 1           | 0      | 0      | 0    | 0               | 0      | 1                  | 1           | 0       | 0           | 1          |

|     | A        | B            | C           | D                         | E                                  | F                           | G                          | H            | I              | J     | K   | L      | M            | N              | O    | P            | Q              | R          | S            | T               | U           | V           | W      | X      | Y    | Z               | AA     | AB                 | AC          | AD      | AE          | AF         |
|-----|----------|--------------|-------------|---------------------------|------------------------------------|-----------------------------|----------------------------|--------------|----------------|-------|-----|--------|--------------|----------------|------|--------------|----------------|------------|--------------|-----------------|-------------|-------------|--------|--------|------|-----------------|--------|--------------------|-------------|---------|-------------|------------|
| 1   | Consumer | Gender OF 1M | Age (cont.) | Usual consumer 0 no 1 yes | Freshness 1 not fresh 5 very fresh | will to purchase 0 no 1 yes | will to consume 0 no 1 yes | storage time | Moisten aspect | Slime | Dry | Bright | Cured aspect | Brownish color | Dull | Darker spots | Greenish spots | Wine aroma | garlic aroma | Fermented aroma | Smoke aroma | Cured aroma | Rancid | Sulfur | Mold | Ammoniac/rotten | Butter | Sour/vinegar aroma | Salty taste | Piquant | Sweet taste | Acid taste |
| 342 | 17       | 1            | 30          | 1                         | 3                                  | 1                           | 1                          | 84           | 0              | 0     | 0   | 0      | 1            | 0              | 0    | 0            | 0              | 1          | 0            | 0               | 0           | 0           | 0      | 0      | 0    | 0               | 0      | 0                  | 0           | 0       | 0           | 0          |
| 343 | 18       | 0            | 59          | 1                         | 2                                  | 1                           | 1                          | 84           | 1              | 0     | 0   | 1      | 0            | 0              | 0    | 0            | 0              | 0          | 0            | 0               | 0           | 1           | 0      | 0      | 0    | 0               | 0      | 0                  | 0           | 0       | 0           | 0          |
| 344 | 19       | 0            | 23          | 1                         | 4                                  | 1                           | 1                          | 84           | 0              | 0     | 0   | 0      | 1            | 1              | 1    | 0            | 0              | 1          | 0            | 0               | 0           | 1           | 0      | 0      | 0    | 0               | 0      | 0                  | 0           | 0       | 0           | 0          |
| 345 | 20       | 0            | 22          | 0                         | 2                                  | 0                           | 0                          | 84           | 1              | 0     | 0   | 0      | 1            | 0              | 0    | 0            | 0              | 0          | 0            | 0               | 0           | 1           | 0      | 0      | 0    | 0               | 0      | 0                  | 0           | 0       | 0           | 0          |
| 346 | 21       | 0            | 23          | 1                         | 3                                  | 1                           | 1                          | 84           | 0              | 0     | 1   | 0      | 1            | 0              | 1    | 0            | 0              | 0          | 0            | 1               | 0           | 1           | 0      | 0      | 0    | 0               | 0      | 0                  | 0           | 0       | 1           | 0          |
| 347 | 22       | 0            | 28          | 1                         | 4                                  | 1                           | 1                          | 84           | 0              | 0     | 1   | 1      | 1            | 0              | 0    | 0            | 0              | 1          | 0            | 0               | 0           | 1           | 0      | 0      | 0    | 0               | 0      | 0                  | 0           | 0       | 0           | 0          |
| 348 | 23       | 1            | 23          | 1                         | 2                                  | 0                           | 0                          | 84           | 0              | 0     | 1   | 0      | 0            | 0              | 1    | 0            | 0              | 0          | 0            | 1               | 0           | 0           | 0      | 0      | 0    | 0               | 0      | 0                  | 0           | 1       | 0           | 0          |
| 349 | 24       | 1            | 39          | 1                         | 3                                  | 1                           | 1                          | 84           | 0              | 0     | 1   | 0      | 1            | 0              | 0    | 0            | 0              | 1          | 1            | 0               | 0           | 1           | 0      | 0      | 0    | 0               | 0      | 0                  | 1           | 0       | 0           | 1          |
| 350 | 25       | 0            | 26          | 1                         | 3                                  | 1                           | 1                          | 84           | 0              | 0     | 1   | 0      | 0            | 0              | 1    | 0            | 0              | 1          | 0            | 0               | 1           | 0           | 0      | 0      | 0    | 0               | 0      | 1                  | 0           | 0       | 0           | 0          |
| 351 | 26       | 0            | 27          | 1                         | 4                                  | 1                           | 1                          | 84           | 0              | 0     | 1   | 0      | 1            | 0              | 0    | 0            | 0              | 0          | 0            | 0               | 0           | 1           | 0      | 0      | 0    | 0               | 0      | 0                  | 0           | 0       | 0           | 0          |
| 352 | 27       | 0            | 36          | 1                         | 3                                  | 1                           | 1                          | 84           | 1              | 0     | 0   | 1      | 1            | 0              | 0    | 0            | 0              | 1          | 0            | 0               | 0           | 1           | 0      | 0      | 0    | 0               | 0      | 1                  | 0           | 0       | 1           | 0          |
| 353 | 28       | 1            | 49          | 1                         | 2                                  | 1                           | 1                          | 84           | 0              | 0     | 1   | 1      | 1            | 0              | 0    | 0            | 0              | 1          | 0            | 0               | 1           | 0           | 0      | 0      | 0    | 0               | 0      | 1                  | 0           | 0       | 0           | 0          |
| 354 | 29       | 1            | 23          | 0                         | 1                                  | 0                           | 0                          | 84           | 0              | 0     | 1   | 0      | 0            | 0              | 1    | 0            | 0              | 1          | 1            | 1               | 0           | 0           | 1      | 0      | 0    | 0               | 0      | 1                  | 1           | 1       | 0           | 0          |
| 355 | 30       | 0            | 46          | 1                         | 3                                  | 1                           | 1                          | 84           | 0              | 0     | 1   | 0      | 1            | 0              | 1    | 0            | 0              | 1          | 1            | 1               | 1           | 1           | 0      | 0      | 0    | 0               | 0      | 0                  | 1           | 1       | 0           | 1          |
| 356 | 31       | 1            | 47          | 1                         | 3                                  | 1                           | 1                          | 84           | 0              | 0     | 1   | 0      | 1            | 0              | 0    | 0            | 1              | 0          | 0            | 0               | 0           | 1           | 0      | 0      | 0    | 0               | 0      | 0                  | 0           | 0       | 0           | 0          |
| 357 | 32       | 0            | 53          | 1                         | 4                                  | 1                           | 1                          | 84           | 0              | 0     | 1   | 0      | 1            | 0              | 0    | 0            | 0              | 1          | 0            | 0               | 1           | 1           | 0      | 0      | 0    | 0               | 0      | 0                  | 1           | 0       | 0           | 0          |
| 358 | 33       | 0            | 48          | 1                         | 3                                  | 1                           | 1                          | 84           | 1              | 0     | 0   | 1      | 0            | 0              | 0    | 0            | 0              | 1          | 0            | 0               | 1           | 0           | 0      | 0      | 0    | 0               | 0      | 0                  | 0           | 0       | 0           | 0          |
| 359 | 34       | 1            | 52          | 1                         | 3                                  | 0                           | 1                          | 84           | 0              | 0     | 1   | 0      | 0            | 0              | 0    | 1            | 1              | 1          | 0            | 0               | 1           | 0           | 0      | 0      | 0    | 0               | 0      | 0                  | 0           | 0       | 0           | 0          |
| 360 | 35       | 0            | 23          | 1                         | 5                                  | 1                           | 1                          | 84           | 0              | 0     | 0   | 0      | 1            | 0              | 0    | 0            | 0              | 0          | 0            | 0               | 0           | 0           | 0      | 0      | 0    | 0               | 0      | 0                  | 0           | 0       | 0           | 0          |
| 361 | 36       | 0            | 44          | 0                         | 3                                  | 0                           | 1                          | 84           | 0              | 0     | 1   | 0      | 0            | 1              | 1    | 0            | 0              | 1          | 0            | 0               | 0           | 1           | 0      | 0      | 0    | 0               | 0      | 1                  | 1           | 0       | 0           | 0          |

|     | A        | B            | C           | D                         | E                                  | F                           | G                          | H            | I              | J     | K   | L      | M            | N              | O    | P            | Q              | R          | S            | T               | U           | V           | W      | X      | Y    | Z               | AA     | AB                 | AC         | AD      | AE          | AF         |
|-----|----------|--------------|-------------|---------------------------|------------------------------------|-----------------------------|----------------------------|--------------|----------------|-------|-----|--------|--------------|----------------|------|--------------|----------------|------------|--------------|-----------------|-------------|-------------|--------|--------|------|-----------------|--------|--------------------|------------|---------|-------------|------------|
| 1   | Consumer | Gender OF 1M | Age (cont.) | Usual consumer 0 no 1 yes | Freshness 1 not fresh 5 very fresh | will to purchase 0 no 1 yes | will to consume 0 no 1 yes | storage time | Moisten aspect | Slime | Dry | Bright | Cured aspect | Brownish color | Dull | Darker spots | Greenish spots | Wine aroma | garlic aroma | Fermented aroma | Smoke aroma | Cured aroma | Rancid | Sulfur | Mold | Ammoniac/rotten | Butter | Sour/vinegar aroma | Salty tase | Piquant | Sweet taste | Acid taste |
| 362 | 37       | 0            | 26          | 1                         | 4                                  | 0                           | 0                          | 84           | 1              | 0     | 0   | 1      | 0            | 0              | 0    | 0            | 0              | 0          | 0            | 1               | 0           | 0           | 0      | 0      | 0    | 0               | 0      | 0                  | 0          | 0       | 0           | 0          |
| 363 | 38       | 0            | 26          | 1                         | 3                                  | 0                           | 1                          | 84           | 1              | 0     | 0   | 0      | 1            | 0              | 0    | 0            | 0              | 1          | 0            | 0               | 0           | 0           | 0      | 0      | 0    | 0               | 0      | 0                  | 0          | 0       | 0           | 0          |
| 364 | 39       | 0            | 44          | 1                         | 5                                  | 1                           | 1                          | 84           | 0              | 1     | 0   | 0      | 1            | 0              | 0    | 0            | 0              | 1          | 0            | 0               | 0           | 0           | 0      | 0      | 0    | 0               | 0      | 0                  | 0          | 1       | 0           | 0          |
| 365 | 40       | 0            | 21          | 1                         | 5                                  | 1                           | 1                          | 84           | 0              | 0     | 1   | 0      | 1            | 0              | 0    | 0            | 0              | 0          | 0            | 0               | 0           | 1           | 0      | 0      | 0    | 0               | 0      | 0                  | 1          | 0       | 0           | 0          |
| 366 | 41       | 0            | 28          | 1                         | 5                                  | 1                           | 1                          | 84           | 0              | 1     | 0   | 1      | 0            | 0              | 0    | 0            | 0              | 0          | 0            | 0               | 0           | 0           | 0      | 0      | 0    | 0               | 0      | 0                  | 1          | 0       | 0           | 0          |
| 367 | 42       | 0            | 24          | 1                         | 4                                  | 1                           | 1                          | 84           | 1              | 0     | 0   | 1      | 1            | 0              | 0    | 0            | 0              | 0          | 1            | 0               | 0           | 0           | 0      | 0      | 0    | 0               | 0      | 0                  | 1          | 0       | 0           | 0          |
| 368 | 43       | 0            | 23          | 1                         | 4                                  | 1                           | 1                          | 84           | 0              | 0     | 1   | 1      | 1            | 0              | 0    | 0            | 1              | 1          | 0            | 1               | 0           | 1           | 0      | 0      | 0    | 0               | 0      | 0                  | 0          | 1       | 1           | 0          |
| 369 | 44       | 1            | 32          | 1                         | 4                                  | 1                           | 1                          | 84           | 1              | 0     | 0   | 1      | 0            | 0              | 0    | 0            | 0              | 1          | 0            | 0               | 0           | 0           | 0      | 0      | 0    | 0               | 0      | 1                  | 0          | 0       | 0           | 0          |
| 370 | 45       | 1            | 55          | 1                         | 5                                  | 1                           | 1                          | 84           | 1              | 0     | 0   | 1      | 1            | 0              | 0    | 0            | 0              | 0          | 0            | 0               | 0           | 1           | 0      | 0      | 0    | 0               | 0      | 0                  | 1          | 0       | 0           | 0          |
| 371 | 46       | 1            | 54          | 1                         | 3                                  | 0                           | 0                          | 84           | 0              | 1     | 0   | 0      | 0            | 0              | 0    | 1            | 0              | 0          | 0            | 0               | 0           | 0           | 1      | 0      | 0    | 0               | 0      | 0                  | 0          | 0       | 0           | 1          |
| 372 | 47       | 0            | 57          | 0                         | 3                                  | 1                           | 1                          | 84           | 0              | 1     | 0   | 0      | 0            | 1              | 0    | 0            | 0              | 1          | 1            | 0               | 0           | 0           | 0      | 0      | 0    | 0               | 0      | 0                  | 0          | 0       | 0           | 0          |
| 373 | 48       | 1            | 42          | 1                         | 5                                  | 1                           | 1                          | 84           | 1              | 0     | 0   | 1      | 0            | 0              | 0    | 0            | 0              | 0          | 0            | 0               | 0           | 0           | 0      | 0      | 0    | 0               | 0      | 0                  | 1          | 0       | 0           | 1          |
| 374 | 49       | 0            | 26          | 1                         | 2                                  | 0                           | 0                          | 84           | 0              | 0     | 1   | 0      | 1            | 0              | 0    | 1            | 0              | 0          | 0            | 0               | 0           | 0           | 0      | 0      | 0    | 0               | 0      | 1                  | 0          | 0       | 0           | 1          |
| 375 | 50       | 0            | 56          | 1                         | 5                                  | 1                           | 1                          | 84           | 0              | 0     | 0   | 1      | 1            | 1              | 0    | 0            | 0              | 1          | 1            | 0               | 1           | 0           | 0      | 0      | 0    | 0               | 0      | 0                  | 0          | 1       | 0           | 0          |
| 376 | 51       | 1            | 29          | 1                         | 3                                  | 0                           | 0                          | 84           | 1              | 0     | 0   | 1      | 1            | 0              | 0    | 0            | 0              | 1          | 0            | 0               | 1           | 1           | 0      | 0      | 0    | 0               | 0      | 0                  | 0          | 0       | 0           | 0          |
| 377 | 52       | 0            | 26          | 1                         | 5                                  | 1                           | 1                          | 84           | 0              | 0     | 1   | 0      | 1            | 0              | 1    | 0            | 0              | 1          | 1            | 0               | 0           | 1           | 0      | 0      | 0    | 0               | 0      | 0                  | 0          | 0       | 0           | 0          |
| 378 | 53       | 0            | 26          | 0                         | 5                                  | 1                           | 1                          | 84           | 1              | 0     | 0   | 0      | 1            | 0              | 0    | 0            | 0              | 0          | 1            | 0               | 0           | 1           | 0      | 0      | 0    | 0               | 0      | 0                  | 0          | 0       | 0           | 1          |
| 379 | 54       | 0            | 60          | 1                         | 5                                  | 1                           | 1                          | 84           | 1              | 0     | 0   | 1      | 1            | 0              | 0    | 0            | 0              | 1          | 1            | 0               | 1           | 1           | 0      | 0      | 0    | 0               | 0      | 1                  | 1          | 0       | 0           | 0          |
| 380 | 55       | 0            | 50          | 1                         | 3                                  | 0                           | 1                          | 84           | 1              | 1     | 0   | 1      | 0            | 0              | 0    | 1            | 0              | 0          | 0            | 1               | 0           | 1           | 0      | 0      | 0    | 0               | 0      | 1                  | 1          | 0       | 0           | 1          |
| 381 | 56       | 0            | 54          | 1                         | 4                                  | 1                           | 1                          | 84           | 1              | 0     | 0   | 1      | 1            | 1              | 0    | 0            | 0              | 1          | 1            | 0               | 0           | 0           | 0      | 0      | 0    | 0               | 0      | 0                  | 0          | 0       | 0           | 0          |

|     | A        | B            | C           | D                         | E                                  | F                           | G                          | H            | I              | J     | K   | L      | M            | N              | O    | P            | Q              | R          | S            | T               | U           | V           | W      | X      | Y    | Z               | AA     | AB                 | AC          | AD      | AE          | AF         |
|-----|----------|--------------|-------------|---------------------------|------------------------------------|-----------------------------|----------------------------|--------------|----------------|-------|-----|--------|--------------|----------------|------|--------------|----------------|------------|--------------|-----------------|-------------|-------------|--------|--------|------|-----------------|--------|--------------------|-------------|---------|-------------|------------|
| 1   | Consumer | Gender OF 1M | Age (cont.) | Usual consumer 0 no 1 yes | Freshness 1 not fresh 5 very fresh | will to purchase 0 no 1 yes | will to consume 0 no 1 yes | storage time | Moisten aspect | Slime | Dry | Bright | Cured aspect | Brownish color | Dull | Darker spots | Greenish spots | Wine aroma | garlic aroma | Fermented aroma | Smoke aroma | Cured aroma | Rancid | Sulfur | Mold | Ammoniac/rotten | Butter | Sour/vinegar aroma | Salty taste | Piquant | Sweet taste | Acid taste |
| 382 | 57       | 1            | 38          | 1                         | 4                                  | 1                           | 1                          | 84           | 1              | 0     | 0   | 0      | 1            | 0              | 1    | 0            | 0              | 1          | 1            | 0               | 0           | 1           | 0      | 0      | 0    | 0               | 0      | 0                  | 0           | 0       | 0           | 0          |
| 383 | 58       | 0            | 24          | 1                         | 4                                  | 1                           | 1                          | 84           | 1              | 0     | 0   | 0      | 1            | 0              | 0    | 0            | 0              | 1          | 1            | 0               | 0           | 1           | 0      | 0      | 0    | 0               | 0      | 1                  | 1           | 0       | 0           | 1          |
| 384 | 59       | 0            | 23          | 1                         | 3                                  | 1                           | 1                          | 84           | 1              | 0     | 0   | 1      | 1            | 0              | 1    | 0            | 0              | 1          | 1            | 0               | 1           | 1           | 0      | 0      | 0    | 0               | 0      | 0                  | 1           | 0       | 0           | 0          |
| 385 | 60       | 1            | 22          | 1                         | 3                                  | 1                           | 1                          | 84           | 0              | 1     | 0   | 0      | 1            | 0              | 0    | 0            | 0              | 1          | 0            | 0               | 0           | 1           | 0      | 0      | 0    | 0               | 0      | 0                  | 1           | 0       | 0           | 0          |
| 386 | 61       | 1            | 35          | 1                         | 1                                  | 0                           | 0                          | 84           | 0              | 0     | 1   | 0      | 0            | 0              | 0    | 1            | 0              | 0          | 0            | 0               | 0           | 0           | 0      | 0      | 0    | 0               | 0      | 0                  | 1           | 0       | 0           | 1          |
| 387 | 62       | 1            | 58          | 1                         | 3                                  | 1                           | 1                          | 84           | 1              | 0     | 0   | 0      | 0            | 0              | 0    | 1            | 0              | 1          | 0            | 0               | 1           | 0           | 0      | 0      | 0    | 0               | 0      | 0                  | 0           | 0       | 0           | 1          |
| 388 | 63       | 0            | 26          | 1                         | 3                                  | 0                           | 0                          | 84           | 1              | 0     | 0   | 0      | 0            | 0              | 1    | 0            | 0              | 1          | 0            | 0               | 0           | 0           | 0      | 0      | 0    | 0               | 0      | 1                  | 0           | 0       | 0           | 0          |
| 389 | 64       | 0            | 56          | 1                         | 4                                  | 1                           | 1                          | 84           | 0              | 0     | 1   | 0      | 1            | 0              | 0    | 0            | 0              | 0          | 0            | 0               | 1           | 0           | 0      | 0      | 0    | 0               | 0      | 0                  | 0           | 1       | 0           | 0          |
| 390 | 65       | 0            | 33          | 1                         | 3                                  | 1                           | 1                          | 84           | 1              | 0     | 0   | 1      | 1            | 0              | 0    | 0            | 0              | 1          | 0            | 1               | 0           | 0           | 0      | 0      | 0    | 0               | 0      | 1                  | 1           | 0       | 0           | 1          |
| 391 | 66       | 0            | 54          | 1                         | 4                                  | 1                           | 1                          | 84           | 0              | 0     | 1   | 0      | 1            | 0              | 0    | 0            | 0              | 1          | 0            | 0               | 1           | 0           | 0      | 0      | 0    | 0               | 0      | 0                  | 1           | 0       | 0           | 0          |
| 392 | 67       | 1            | 25          | 1                         | 5                                  | 1                           | 1                          | 84           | 1              | 0     | 0   | 0      | 1            | 0              | 0    | 0            | 0              | 0          | 0            | 0               | 0           | 1           | 0      | 0      | 0    | 0               | 0      | 1                  | 1           | 0       | 0           | 1          |
| 393 | 68       | 1            | 25          | 1                         | 4                                  | 1                           | 1                          | 84           | 1              | 0     | 0   | 1      | 1            | 0              | 0    | 0            | 0              | 1          | 1            | 0               | 0           | 1           | 0      | 0      | 0    | 0               | 0      | 0                  | 1           | 0       | 0           | 0          |
| 394 | 69       | 1            | 29          | 1                         | 5                                  | 1                           | 1                          | 84           | 1              | 0     | 0   | 1      | 0            | 0              | 0    | 0            | 0              | 1          | 1            | 0               | 1           | 1           | 0      | 0      | 0    | 0               | 0      | 0                  | 1           | 0       | 0           | 0          |
| 395 | 70       | 1            | 56          | 1                         | 4                                  | 1                           | 1                          | 84           | 1              | 0     | 0   | 1      | 1            | 0              | 0    | 0            | 0              | 1          | 1            | 0               | 0           | 0           | 0      | 0      | 0    | 0               | 0      | 0                  | 1           | 0       | 0           | 0          |
| 396 | 71       | 1            | 50          | 1                         | 3                                  | 1                           | 1                          | 84           | 1              | 0     | 1   | 0      | 1            | 0              | 0    | 0            | 0              | 0          | 0            | 0               | 1           | 0           | 0      | 0      | 0    | 0               | 0      | 0                  | 1           | 0       | 0           | 0          |
| 397 | 72       | 0            | 57          | 1                         | 5                                  | 1                           | 1                          | 84           | 0              | 1     | 0   | 1      | 1            | 0              | 0    | 0            | 0              | 1          | 1            | 0               | 0           | 0           | 0      | 0      | 0    | 0               | 0      | 0                  | 1           | 0       | 0           | 0          |
| 398 | 73       | 1            | 22          | 1                         | 5                                  | 1                           | 1                          | 84           | 0              | 0     | 1   | 0      | 1            | 0              | 0    | 0            | 0              | 1          | 1            | 0               | 0           | 1           | 0      | 0      | 0    | 0               | 0      | 0                  | 1           | 0       | 0           | 1          |
| 399 | 74       | 1            | 55          | 1                         | 4                                  | 1                           | 1                          | 84           | 1              | 0     | 0   | 1      | 1            | 0              | 0    | 0            | 0              | 1          | 1            | 0               | 0           | 0           | 0      | 0      | 0    | 0               | 0      | 0                  | 1           | 0       | 0           | 0          |
| 400 | 75       | 0            | 26          | 1                         | 4                                  | 1                           | 1                          | 84           | 0              | 0     | 1   | 0      | 1            | 0              | 0    | 0            | 0              | 0          | 1            | 0               | 0           | 1           | 0      | 0      | 0    | 0               | 0      | 0                  | 0           | 0       | 1           | 0          |
| 401 | 76       | 0            | 53          | 1                         | 4                                  | 1                           | 1                          | 84           | 1              | 0     | 0   | 1      | 1            | 0              | 0    | 0            | 0              | 1          | 1            | 0               | 0           | 1           | 0      | 0      | 0    | 0               | 0      | 0                  | 1           | 0       | 0           | 0          |

|     | A        | B            | C           | D                         | E                                  | F                           | G                          | H            | I              | J     | K   | L      | M            | N              | O    | P            | Q              | R          | S            | T               | U           | V           | W      | X      | Y    | Z               | AA     | AB                 | AC          | AD      | AE          | AF         |
|-----|----------|--------------|-------------|---------------------------|------------------------------------|-----------------------------|----------------------------|--------------|----------------|-------|-----|--------|--------------|----------------|------|--------------|----------------|------------|--------------|-----------------|-------------|-------------|--------|--------|------|-----------------|--------|--------------------|-------------|---------|-------------|------------|
| 1   | Consumer | Gender OF 1M | Age (cont.) | Usual consumer 0 no 1 yes | Freshness 1 not fresh 5 very fresh | will to purchase 0 no 1 yes | will to consume 0 no 1 yes | storage time | Moisten aspect | Slime | Dry | Bright | Cured aspect | Brownish color | Dull | Darker spots | Greenish spots | Wine aroma | garlic aroma | Fermented aroma | Smoke aroma | Cured aroma | Rancid | Sulfur | Mold | Ammoniac/rotten | Butter | Sour/vinegar aroma | Salty taste | Piquant | Sweet taste | Acid taste |
| 402 | 77       | 1            | 53          | 1                         | 3                                  | 1                           | 1                          | 84           | 0              | 0     | 1   | 0      | 0            | 0              | 1    | 0            | 0              | 1          | 0            | 0               | 1           | 0           | 0      | 0      | 0    | 0               | 0      | 0                  | 1           | 1       | 0           | 0          |
| 403 | 78       | 1            | 58          | 1                         | 3                                  | 1                           | 1                          | 84           | 1              | 0     | 0   | 1      | 0            | 0              | 0    | 0            | 0              | 0          | 1            | 0               | 0           | 0           | 0      | 0      | 0    | 0               | 0      | 0                  | 1           | 0       | 0           | 0          |
| 404 | 79       | 0            | 60          | 1                         | 4                                  | 1                           | 1                          | 84           | 0              | 1     | 0   | 0      | 0            | 0              | 1    | 0            | 0              | 0          | 0            | 0               | 0           | 0           | 0      | 0      | 0    | 0               | 0      | 0                  | 1           | 0       | 0           | 0          |
| 405 | 80       | 1            | 26          | 1                         | 3                                  | 0                           | 1                          | 84           | 0              | 0     | 1   | 1      | 0            | 0              | 0    | 0            | 0              | 0          | 0            | 0               | 0           | 0           | 0      | 0      | 0    | 0               | 0      | 0                  | 1           | 0       | 0           | 0          |
| 406 | 81       | 0            | 27          | 1                         | 5                                  | 1                           | 1                          | 84           | 0              | 0     | 1   | 1      | 1            | 0              | 0    | 0            | 0              | 1          | 0            | 0               | 0           | 1           | 0      | 0      | 0    | 0               | 0      | 0                  | 1           | 0       | 0           | 0          |
| 407 | 1        | 1            | 24          | 1                         | 5                                  | 1                           | 1                          | 105          | 0              | 0     | 1   | 0      | 1            | 0              | 1    | 0            | 0              | 1          | 1            | 0               | 0           | 1           | 0      | 0      | 0    | 0               | 0      | 0                  | 1           | 0       | 0           | 0          |
| 408 | 2        | 0            | 23          | 1                         | 4                                  | 1                           | 1                          | 105          | 0              | 0     | 1   | 0      | 1            | 0              | 0    | 0            | 0              | 0          | 0            | 0               | 0           | 0           | 0      | 0      | 0    | 0               | 0      | 0                  | 1           | 0       | 0           | 0          |
| 409 | 3        | 1            | 53          | 1                         | 4                                  | 1                           | 1                          | 105          | 1              | 0     | 0   | 0      | 0            | 0              | 0    | 1            | 0              | 1          | 0            | 0               | 0           | 1           | 0      | 0      | 0    | 0               | 0      | 0                  | 1           | 0       | 0           | 0          |
| 410 | 4        | 0            | 52          | 1                         | 3                                  | 1                           | 1                          | 105          | 0              | 0     | 1   | 1      | 1            | 0              | 0    | 0            | 0              | 1          | 1            | 0               | 1           | 1           | 0      | 0      | 0    | 0               | 0      | 0                  | 1           | 0       | 0           | 0          |
| 411 | 5        | 0            | 23          | 1                         | 4                                  | 1                           | 1                          | 105          | 1              | 0     | 0   | 1      | 1            | 0              | 0    | 0            | 0              | 1          | 1            | 1               | 0           | 1           | 0      | 0      | 0    | 0               | 0      | 0                  | 1           | 0       | 0           | 1          |
| 412 | 6        | 0            | 23          | 1                         | 4                                  | 1                           | 1                          | 105          | 0              | 1     | 1   | 1      | 1            | 0              | 0    | 1            | 0              | 1          | 1            | 0               | 1           | 1           | 0      | 0      | 0    | 0               | 0      | 0                  | 1           | 0       | 0           | 1          |
| 413 | 7        | 1            | 55          | 1                         | 5                                  | 1                           | 1                          | 105          | 1              | 0     | 0   | 1      | 1            | 0              | 0    | 0            | 0              | 0          | 1            | 0               | 1           | 1           | 0      | 0      | 0    | 0               | 0      | 0                  | 0           | 0       | 0           | 0          |
| 414 | 8        | 0            | 54          | 1                         | 4                                  | 1                           | 1                          | 105          | 1              | 0     | 0   | 1      | 1            | 1              | 0    | 0            | 0              | 1          | 1            | 0               | 0           | 0           | 0      | 0      | 0    | 0               | 0      | 0                  | 0           | 0       | 0           | 0          |
| 415 | 9        | 1            | 21          | 1                         | 3                                  | 1                           | 1                          | 105          | 0              | 1     | 1   | 1      | 0            | 0              | 1    | 0            | 0              | 0          | 0            | 0               | 0           | 1           | 0      | 0      | 0    | 0               | 0      | 0                  | 1           | 0       | 0           | 1          |
| 416 | 10       | 1            | 55          | 1                         | 4                                  | 1                           | 1                          | 105          | 1              | 0     | 0   | 0      | 1            | 0              | 1    | 0            | 0              | 1          | 1            | 0               | 1           | 1           | 0      | 0      | 0    | 0               | 0      | 1                  | 1           | 0       | 0           | 0          |
| 417 | 11       | 0            | 23          | 0                         | 4                                  | 1                           | 1                          | 105          | 0              | 1     | 0   | 0      | 1            | 0              | 0    | 0            | 0              | 0          | 0            | 0               | 0           | 1           | 0      | 0      | 0    | 0               | 0      | 0                  | 0           | 0       | 0           | 0          |
| 418 | 12       | 0            | 52          | 1                         | 5                                  | 1                           | 1                          | 105          | 0              | 0     | 1   | 1      | 1            | 0              | 0    | 0            | 0              | 1          | 1            | 0               | 0           | 1           | 0      | 0      | 0    | 0               | 0      | 0                  | 0           | 1       | 0           | 0          |
| 419 | 13       | 1            | 50          | 0                         | 4                                  | 1                           | 1                          | 105          | 0              | 0     | 1   | 1      | 1            | 0              | 0    | 0            | 0              | 0          | 0            | 0               | 0           | 1           | 0      | 0      | 0    | 0               | 0      | 0                  | 0           | 0       | 0           | 0          |
| 420 | 14       | 1            | 85          | 1                         | 5                                  | 1                           | 1                          | 105          | 0              | 0     | 0   | 1      | 0            | 0              | 0    | 0            | 0              | 1          | 1            | 0               | 1           | 1           | 0      | 0      | 0    | 0               | 0      | 0                  | 1           | 0       | 0           | 0          |
| 421 | 15       | 1            | 60          | 0                         | 4                                  | 1                           | 1                          | 105          | 0              | 0     | 1   | 1      | 1            | 0              | 0    | 0            | 0              | 1          | 1            | 0               | 1           | 1           | 0      | 0      | 0    | 0               | 0      | 0                  | 0           | 0       | 0           | 0          |

|     | A        | B            | C           | D                         | E                                  | F                           | G                          | H            | I              | J     | K   | L      | M            | N              | O    | P            | Q              | R          | S            | T               | U           | V           | W      | X      | Y    | Z               | AA     | AB                 | AC         | AD      | AE          | AF         |   |
|-----|----------|--------------|-------------|---------------------------|------------------------------------|-----------------------------|----------------------------|--------------|----------------|-------|-----|--------|--------------|----------------|------|--------------|----------------|------------|--------------|-----------------|-------------|-------------|--------|--------|------|-----------------|--------|--------------------|------------|---------|-------------|------------|---|
| 1   | Consumer | Gender OF 1M | Age (cont.) | Usual consumer 0 no 1 yes | Freshness 1 not fresh 5 very fresh | will to purchase 0 no 1 yes | will to consume 0 no 1 yes | storage time | Moisten aspect | Slime | Dry | Bright | Cured aspect | Brownish color | Dull | Darker spots | Greenish spots | Wine aroma | garlic aroma | Fermented aroma | Smoke aroma | Cured aroma | Rancid | Sulfur | Mold | Ammoniac/rotten | Butter | Sour/vinegar aroma | Salty tase | Piquant | Sweet taste | Acid taste |   |
| 422 | 16       | 0            | 58          | 1                         | 5                                  | 1                           | 1                          | 105          | 0              | 0     | 1   | 0      | 1            | 0              | 0    | 0            | 0              | 0          | 0            | 0               | 0           | 1           | 0      | 0      | 0    | 0               | 0      | 0                  | 0          | 0       | 0           | 1          |   |
| 423 | 17       | 1            | 30          | 1                         | 3                                  | 1                           | 1                          | 105          | 0              | 1     | 0   | 0      | 0            | 1              | 0    | 0            | 0              | 1          | 1            | 0               | 0           | 0           | 0      | 0      | 0    | 0               | 0      | 0                  | 0          | 0       | 0           | 0          | 0 |
| 424 | 18       | 0            | 59          | 1                         | 2                                  | 0                           | 0                          | 105          | 0              | 1     | 0   | 0      | 0            | 1              | 0    | 0            | 0              | 0          | 0            | 0               | 0           | 0           | 1      | 1      | 0    | 0               | 0      | 0                  | 0          | 1       | 0           | 1          |   |
| 425 | 19       | 0            | 23          | 1                         | 5                                  | 0                           | 0                          | 105          | 0              | 0     | 1   | 1      | 0            | 0              | 0    | 0            | 0              | 1          | 0            | 0               | 1           | 0           | 0      | 0      | 0    | 0               | 0      | 0                  | 1          | 0       | 0           | 1          |   |
| 426 | 20       | 0            | 22          | 0                         | 4                                  | 1                           | 1                          | 105          | 0              | 1     | 0   | 0      | 0            | 1              | 0    | 0            | 0              | 1          | 1            | 0               | 0           | 0           | 0      | 0      | 0    | 0               | 0      | 0                  | 1          | 0       | 0           | 0          |   |
| 427 | 21       | 0            | 23          | 1                         | 1                                  | 0                           | 0                          | 105          | 0              | 0     | 1   | 0      | 1            | 1              | 1    | 0            | 0              | 0          | 0            | 0               | 0           | 0           | 0      | 0      | 0    | 0               | 0      | 0                  | 1          | 0       | 0           | 0          |   |
| 428 | 22       | 0            | 28          | 1                         | 4                                  | 1                           | 1                          | 105          | 1              | 0     | 0   | 1      | 1            | 0              | 0    | 1            | 0              | 1          | 1            | 0               | 1           | 0           | 0      | 0      | 0    | 0               | 0      | 0                  | 1          | 0       | 1           | 0          |   |
| 429 | 23       | 1            | 23          | 1                         | 4                                  | 1                           | 1                          | 105          | 0              | 0     | 1   | 1      | 1            | 0              | 0    | 0            | 0              | 0          | 0            | 0               | 0           | 1           | 0      | 0      | 0    | 0               | 0      | 0                  | 1          | 0       | 0           | 0          |   |
| 430 | 24       | 1            | 39          | 1                         | 4                                  | 1                           | 1                          | 105          | 0              | 1     | 0   | 0      | 0            | 1              | 0    | 0            | 0              | 0          | 0            | 0               | 0           | 0           | 0      | 0      | 0    | 0               | 0      | 1                  | 1          | 0       | 0           | 0          |   |
| 431 | 25       | 0            | 26          | 1                         | 5                                  | 1                           | 1                          | 105          | 0              | 0     | 1   | 0      | 1            | 0              | 0    | 0            | 0              | 1          | 1            | 0               | 0           | 1           | 0      | 0      | 0    | 0               | 0      | 0                  | 0          | 0       | 0           | 1          |   |
| 432 | 26       | 0            | 27          | 1                         | 4                                  | 1                           | 1                          | 105          | 0              | 0     | 1   | 0      | 0            | 0              | 1    | 0            | 0              | 1          | 0            | 0               | 0           | 0           | 0      | 0      | 0    | 0               | 0      | 0                  | 0          | 1       | 0           | 0          |   |
| 433 | 27       | 0            | 36          | 1                         | 2                                  | 0                           | 0                          | 105          | 0              | 0     | 1   | 0      | 1            | 0              | 0    | 0            | 0              | 0          | 0            | 0               | 0           | 1           | 0      | 0      | 0    | 0               | 0      | 0                  | 1          | 0       | 0           | 0          |   |
| 434 | 28       | 1            | 49          | 1                         | 3                                  | 0                           | 0                          | 105          | 0              | 0     | 1   | 0      | 1            | 0              | 0    | 0            | 0              | 0          | 0            | 0               | 0           | 1           | 0      | 0      | 0    | 0               | 0      | 0                  | 1          | 0       | 0           | 0          |   |
| 435 | 29       | 1            | 23          | 0                         | 5                                  | 1                           | 1                          | 105          | 0              | 1     | 1   | 0      | 1            | 0              | 1    | 0            | 0              | 1          | 0            | 0               | 1           | 1           | 0      | 0      | 0    | 0               | 0      | 0                  | 1          | 0       | 1           | 1          |   |
| 436 | 30       | 0            | 46          | 1                         | 5                                  | 1                           | 1                          | 105          | 1              | 0     | 0   | 1      | 1            | 0              | 0    | 0            | 0              | 1          | 0            | 0               | 1           | 0           | 0      | 0      | 0    | 0               | 0      | 0                  | 0          | 1       | 0           | 0          |   |
| 437 | 31       | 1            | 47          | 1                         | 4                                  | 0                           | 1                          | 105          | 0              | 0     | 1   | 0      | 1            | 0              | 0    | 0            | 0              | 1          | 0            | 1               | 0           | 0           | 0      | 0      | 0    | 0               | 0      | 0                  | 0          | 1       | 0           | 0          |   |
| 438 | 32       | 0            | 53          | 1                         | 4                                  | 1                           | 1                          | 105          | 0              | 1     | 0   | 1      | 1            | 0              | 0    | 0            | 0              | 0          | 1            | 0               | 0           | 1           | 0      | 0      | 0    | 0               | 0      | 0                  | 1          | 0       | 0           | 0          |   |
| 439 | 33       | 0            | 48          | 1                         | 4                                  | 0                           | 0                          | 105          | 1              | 0     | 0   | 1      | 0            | 0              | 0    | 0            | 0              | 1          | 0            | 0               | 0           | 1           | 0      | 0      | 0    | 0               | 0      | 0                  | 1          | 0       | 0           | 0          |   |
| 440 | 34       | 1            | 52          | 1                         | 5                                  | 1                           | 1                          | 105          | 0              | 0     | 1   | 0      | 1            | 0              | 0    | 0            | 0              | 1          | 0            | 1               | 1           | 0           | 0      | 0      | 0    | 0               | 0      | 0                  | 1          | 0       | 0           | 0          |   |
| 441 | 35       | 0            | 23          | 1                         | 4                                  | 1                           | 1                          | 105          | 0              | 1     | 0   | 1      | 1            | 0              | 0    | 0            | 0              | 0          | 0            | 0               | 0           | 1           | 0      | 0      | 0    | 0               | 0      | 0                  | 0          | 0       | 0           | 0          |   |

|     | A        | B            | C           | D                         | E                                  | F                           | G                          | H            | I              | J     | K   | L      | M            | N              | O    | P            | Q              | R          | S            | T               | U           | V           | W      | X      | Y    | Z               | AA     | AB                 | AC          | AD      | AE          | AF         |
|-----|----------|--------------|-------------|---------------------------|------------------------------------|-----------------------------|----------------------------|--------------|----------------|-------|-----|--------|--------------|----------------|------|--------------|----------------|------------|--------------|-----------------|-------------|-------------|--------|--------|------|-----------------|--------|--------------------|-------------|---------|-------------|------------|
| 1   | Consumer | Gender OF 1M | Age (cont.) | Usual consumer 0 no 1 yes | Freshness 1 not fresh 5 very fresh | will to purchase 0 no 1 yes | will to consume 0 no 1 yes | storage time | Moisten aspect | Slime | Dry | Bright | Cured aspect | Brownish color | Dull | Darker spots | Greenish spots | Wine aroma | garlic aroma | Fermented aroma | Smoke aroma | Cured aroma | Rancid | Sulfur | Mold | Ammoniac/rotten | Butter | Sour/vinegar aroma | Salty taste | Piquant | Sweet taste | Acid taste |
| 442 | 36       | 0            | 44          | 0                         | 3                                  | 1                           | 1                          | 105          | 0              | 0     | 1   | 0      | 1            | 0              | 1    | 0            | 0              | 1          | 1            | 0               | 1           | 1           | 0      | 0      | 0    | 0               | 0      | 0                  | 1           | 1       | 1           | 1          |
| 443 | 37       | 0            | 26          | 1                         | 1                                  | 0                           | 0                          | 105          | 0              | 0     | 1   | 0      | 0            | 0              | 1    | 0            | 0              | 1          | 1            | 1               | 1           | 0           | 0      | 0      | 0    | 0               | 0      | 1                  | 1           | 0       | 0           | 0          |
| 444 | 38       | 0            | 26          | 1                         | 1                                  | 0                           | 0                          | 105          | 0              | 0     | 1   | 0      | 1            | 1              | 1    | 1            | 0              | 0          | 0            | 0               | 1           | 0           | 0      | 0      | 0    | 1               | 0      | 1                  | 0           | 1       | 1           | 1          |
| 445 | 39       | 0            | 44          | 1                         | 2                                  | 0                           | 0                          | 105          | 0              | 0     | 1   | 0      | 0            | 1              | 1    | 0            | 0              | 1          | 0            | 0               | 1           | 1           | 0      | 0      | 0    | 0               | 0      | 0                  | 0           | 0       | 1           | 0          |
| 446 | 40       | 0            | 21          | 1                         | 2                                  | 0                           | 0                          | 105          | 0              | 0     | 1   | 0      | 0            | 0              | 1    | 0            | 0              | 0          | 0            | 0               | 1           | 0           | 0      | 0      | 0    | 0               | 0      | 1                  | 0           | 0       | 0           | 1          |
| 447 | 41       | 0            | 28          | 1                         | 4                                  | 1                           | 1                          | 105          | 0              | 0     | 1   | 1      | 1            | 0              | 0    | 0            | 0              | 0          | 0            | 0               | 0           | 1           | 0      | 0      | 0    | 0               | 0      | 0                  | 0           | 0       | 0           | 0          |
| 448 | 42       | 0            | 24          | 1                         | 4                                  | 1                           | 1                          | 105          | 0              | 0     | 1   | 1      | 1            | 0              | 0    | 0            | 0              | 1          | 0            | 0               | 0           | 0           | 0      | 0      | 0    | 0               | 0      | 1                  | 0           | 0       | 0           | 0          |
| 449 | 43       | 0            | 23          | 1                         | 3                                  | 1                           | 1                          | 105          | 0              | 0     | 1   | 0      | 1            | 0              | 0    | 0            | 0              | 1          | 0            | 0               | 1           | 1           | 0      | 0      | 0    | 0               | 0      | 0                  | 1           | 1       | 0           | 0          |
| 450 | 44       | 1            | 32          | 1                         | 3                                  | 0                           | 1                          | 105          | 1              | 0     | 0   | 1      | 0            | 0              | 0    | 0            | 0              | 1          | 0            | 0               | 0           | 0           | 0      | 0      | 0    | 0               | 0      | 0                  | 0           | 1       | 0           | 0          |
| 451 | 45       | 1            | 55          | 1                         | 4                                  | 1                           | 1                          | 105          | 1              | 0     | 0   | 1      | 1            | 0              | 0    | 0            | 0              | 0          | 0            | 0               | 1           | 0           | 0      | 0      | 0    | 0               | 0      | 0                  | 1           | 0       | 0           | 0          |
| 452 | 46       | 1            | 54          | 1                         | 3                                  | 1                           | 1                          | 105          | 0              | 0     | 1   | 0      | 1            | 0              | 1    | 0            | 0              | 0          | 0            | 0               | 0           | 1           | 0      | 0      | 0    | 0               | 0      | 0                  | 0           | 0       | 1           | 0          |
| 453 | 47       | 0            | 57          | 0                         | 3                                  | 0                           | 1                          | 105          | 1              | 0     | 0   | 0      | 0            | 0              | 1    | 0            | 0              | 0          | 0            | 0               | 0           | 1           | 0      | 0      | 0    | 0               | 0      | 0                  | 1           | 0       | 0           | 0          |
| 454 | 48       | 1            | 42          | 1                         | 2                                  | 0                           | 0                          | 105          | 0              | 0     | 1   | 0      | 1            | 1              | 0    | 0            | 0              | 0          | 0            | 0               | 1           | 1           | 0      | 0      | 0    | 0               | 0      | 0                  | 0           | 0       | 0           | 0          |
| 455 | 49       | 0            | 26          | 1                         | 3                                  | 1                           | 1                          | 105          | 1              | 0     | 0   | 1      | 0            | 0              | 0    | 0            | 0              | 0          | 0            | 0               | 0           | 0           | 0      | 0      | 0    | 0               | 0      | 1                  | 0           | 0       | 0           | 0          |
| 456 | 50       | 0            | 56          | 1                         | 3                                  | 1                           | 1                          | 105          | 1              | 0     | 0   | 0      | 1            | 0              | 0    | 0            | 0              | 1          | 0            | 0               | 0           | 0           | 0      | 0      | 0    | 0               | 0      | 0                  | 0           | 1       | 0           | 0          |
| 457 | 51       | 1            | 29          | 1                         | 4                                  | 1                           | 1                          | 105          | 0              | 0     | 1   | 1      | 1            | 0              | 0    | 0            | 0              | 1          | 1            | 1               | 0           | 1           | 0      | 0      | 0    | 0               | 0      | 0                  | 1           | 0       | 0           | 1          |
| 458 | 52       | 0            | 26          | 1                         | 4                                  | 1                           | 1                          | 105          | 1              | 0     | 0   | 0      | 1            | 0              | 0    | 0            | 0              | 1          | 0            | 0               | 0           | 0           | 0      | 0      | 0    | 0               | 0      | 0                  | 1           | 0       | 0           | 0          |
| 459 | 53       | 0            | 26          | 0                         | 2                                  | 0                           | 0                          | 105          | 0              | 0     | 1   | 1      | 1            | 0              | 0    | 0            | 0              | 0          | 1            | 0               | 1           | 1           | 1      | 0      | 0    | 0               | 0      | 0                  | 1           | 0       | 0           | 0          |
| 460 | 54       | 0            | 60          | 1                         | 5                                  | 1                           | 1                          | 105          | 0              | 0     | 1   | 0      | 1            | 0              | 0    | 0            | 0              | 1          | 0            | 0               | 1           | 0           | 0      | 0      | 0    | 0               | 0      | 0                  | 1           | 0       | 0           | 0          |
| 461 | 55       | 0            | 50          | 1                         | 3                                  | 1                           | 1                          | 105          | 0              | 0     | 1   | 0      | 0            | 1              | 0    | 0            | 0              | 0          | 0            | 0               | 0           | 1           | 0      | 0      | 0    | 0               | 0      | 0                  | 1           | 0       | 0           | 0          |

|     | A        | B            | C           | D                         | E                                  | F                           | G                          | H            | I              | J     | K   | L      | M            | N              | O    | P            | Q              | R          | S            | T               | U           | V           | W      | X      | Y    | Z               | AA     | AB                 | AC          | AD      | AE          | AF         |
|-----|----------|--------------|-------------|---------------------------|------------------------------------|-----------------------------|----------------------------|--------------|----------------|-------|-----|--------|--------------|----------------|------|--------------|----------------|------------|--------------|-----------------|-------------|-------------|--------|--------|------|-----------------|--------|--------------------|-------------|---------|-------------|------------|
| 1   | Consumer | Gender OF IM | Age (cont.) | Usual consumer 0 no 1 yes | Freshness 1 not fresh 5 very fresh | will to purchase 0 no 1 yes | will to consume 0 no 1 yes | storage time | Moisten aspect | Slime | Dry | Bright | Cured aspect | Brownish color | Dull | Darker spots | Greenish spots | Wine aroma | garlic aroma | Fermented aroma | Smoke aroma | Cured aroma | Rancid | Sulfur | Mold | Ammoniac/rotten | Butter | Sour/vinegar aroma | Salty taste | Piquant | Sweet taste | Acid taste |
| 462 | 56       | 0            | 54          | 1                         | 4                                  | 1                           | 1                          | 105          | 0              | 0     | 0   | 0      | 1            | 0              | 1    | 0            | 0              | 1          | 1            | 0               | 1           | 1           | 0      | 0      | 0    | 0               | 0      | 0                  | 0           | 0       | 0           | 0          |
| 463 | 57       | 1            | 38          | 1                         | 3                                  | 1                           | 1                          | 105          | 0              | 0     | 1   | 1      | 0            | 0              | 0    | 0            | 0              | 0          | 0            | 0               | 0           | 0           | 0      | 0      | 0    | 0               | 0      | 1                  | 0           | 0       | 0           | 0          |
| 464 | 58       | 0            | 24          | 1                         | 4                                  | 1                           | 1                          | 105          | 0              | 0     | 0   | 0      | 0            | 1              | 0    | 1            | 0              | 1          | 0            | 0               | 0           | 0           | 0      | 0      | 0    | 0               | 0      | 1                  | 0           | 0       | 0           | 0          |
| 465 | 59       | 0            | 23          | 1                         | 5                                  | 0                           | 0                          | 105          | 1              | 0     | 0   | 0      | 1            | 0              | 0    | 0            | 0              | 1          | 0            | 0               | 0           | 0           | 0      | 0      | 0    | 0               | 0      | 0                  | 1           | 0       | 0           | 0          |
| 466 | 60       | 1            | 22          | 1                         | 4                                  | 1                           | 1                          | 105          | 1              | 0     | 0   | 1      | 1            | 0              | 0    | 0            | 0              | 0          | 0            | 0               | 0           | 1           | 0      | 0      | 0    | 0               | 0      | 0                  | 1           | 0       | 0           | 0          |
| 467 | 61       | 1            | 35          | 1                         | 1                                  | 0                           | 0                          | 105          | 0              | 0     | 1   | 0      | 1            | 0              | 0    | 1            | 0              | 0          | 0            | 0               | 0           | 1           | 0      | 0      | 0    | 0               | 0      | 0                  | 1           | 0       | 0           | 1          |
| 468 | 62       | 1            | 58          | 1                         | 4                                  | 1                           | 1                          | 105          | 1              | 0     | 0   | 0      | 0            | 0              | 0    | 0            | 0              | 1          | 0            | 0               | 0           | 1           | 0      | 0      | 0    | 0               | 0      | 0                  | 0           | 0       | 0           | 0          |
| 469 | 63       | 0            | 26          | 1                         | 2                                  | 0                           | 0                          | 105          | 0              | 0     | 1   | 0      | 1            | 0              | 0    | 0            | 0              | 0          | 0            | 0               | 1           | 1           | 0      | 0      | 0    | 0               | 0      | 0                  | 0           | 0       | 0           | 0          |
| 470 | 64       | 0            | 56          | 1                         | 4                                  | 1                           | 1                          | 105          | 1              | 0     | 0   | 1      | 1            | 0              | 0    | 0            | 0              | 1          | 0            | 1               | 0           | 0           | 0      | 0      | 0    | 0               | 0      | 0                  | 1           | 0       | 0           | 0          |
| 471 | 65       | 0            | 33          | 1                         | 3                                  | 0                           | 1                          | 105          | 1              | 0     | 0   | 1      | 0            | 0              | 0    | 0            | 0              | 1          | 0            | 0               | 1           | 0           | 0      | 0      | 0    | 0               | 0      | 0                  | 1           | 0       | 0           | 0          |
| 472 | 66       | 0            | 54          | 1                         | 3                                  | 0                           | 0                          | 105          | 1              | 0     | 0   | 1      | 1            | 0              | 0    | 0            | 0              | 1          | 0            | 0               | 0           | 1           | 0      | 0      | 0    | 0               | 0      | 0                  | 1           | 0       | 0           | 1          |
| 473 | 67       | 1            | 25          | 1                         | 3                                  | 0                           | 1                          | 105          | 0              | 0     | 1   | 0      | 0            | 0              | 1    | 0            | 0              | 1          | 1            | 0               | 1           | 0           | 0      | 0      | 0    | 0               | 0      | 1                  | 0           | 0       | 0           | 0          |
| 474 | 68       | 1            | 25          | 1                         | 4                                  | 0                           | 1                          | 105          | 0              | 0     | 1   | 0      | 0            | 0              | 1    | 0            | 0              | 1          | 1            | 0               | 0           | 0           | 0      | 0      | 0    | 0               | 0      | 0                  | 1           | 0       | 0           | 0          |
| 475 | 69       | 1            | 29          | 1                         | 4                                  | 1                           | 1                          | 105          | 0              | 0     | 1   | 0      | 1            | 0              | 1    | 0            | 0              | 1          | 1            | 0               | 1           | 1           | 0      | 0      | 0    | 0               | 0      | 0                  | 1           | 1       | 0           | 0          |
| 476 | 70       | 1            | 56          | 1                         | 4                                  | 1                           | 1                          | 105          | 1              | 0     | 0   | 0      | 0            | 0              | 1    | 0            | 0              | 1          | 0            | 0               | 0           | 0           | 0      | 0      | 0    | 0               | 1      | 0                  | 0           | 0       | 0           | 0          |
| 477 | 71       | 1            | 50          | 1                         | 5                                  | 1                           | 1                          | 105          | 0              | 0     | 1   | 0      | 0            | 0              | 0    | 0            | 0              | 1          | 0            | 0               | 0           | 0           | 0      | 0      | 0    | 0               | 0      | 0                  | 1           | 0       | 0           | 0          |
| 478 | 72       | 0            | 57          | 1                         | 5                                  | 1                           | 1                          | 105          | 0              | 0     | 1   | 1      | 1            | 0              | 0    | 0            | 0              | 1          | 1            | 0               | 0           | 1           | 0      | 0      | 0    | 0               | 0      | 1                  | 1           | 0       | 0           | 1          |
| 479 | 73       | 1            | 22          | 1                         | 4                                  | 1                           | 1                          | 105          | 0              | 0     | 1   | 0      | 1            | 0              | 0    | 0            | 0              | 0          | 0            | 0               | 0           | 1           | 0      | 0      | 0    | 0               | 0      | 0                  | 0           | 0       | 1           | 0          |
| 480 | 74       | 1            | 55          | 1                         | 4                                  | 0                           | 1                          | 105          | 0              | 0     | 1   | 0      | 0            | 0              | 1    | 0            | 0              | 1          | 1            | 0               | 1           | 0           | 0      | 0      | 0    | 0               | 0      | 1                  | 1           | 0       | 0           | 0          |
| 481 | 75       | 0            | 26          | 1                         | 3                                  | 1                           | 1                          | 105          | 0              | 0     | 1   | 0      | 1            | 0              | 0    | 0            | 0              | 1          | 0            | 0               | 0           | 1           | 0      | 0      | 0    | 0               | 0      | 0                  | 1           | 0       | 0           | 0          |



|     | A        | B            | C           | D                         | E                                  | F                           | G                          | H            | I              | J     | K   | L      | M            | N              | O    | P            | Q              | R          | S            | T               | U           | V           | W      | X      | Y    | Z               | AA     | AB                 | AC          | AD      | AE          | AF         |
|-----|----------|--------------|-------------|---------------------------|------------------------------------|-----------------------------|----------------------------|--------------|----------------|-------|-----|--------|--------------|----------------|------|--------------|----------------|------------|--------------|-----------------|-------------|-------------|--------|--------|------|-----------------|--------|--------------------|-------------|---------|-------------|------------|
| 1   | Consumer | Gender OF 1M | Age (cont.) | Usual consumer 0 no 1 yes | Freshness 1 not fresh 5 very fresh | will to purchase 0 no 1 yes | will to consume 0 no 1 yes | storage time | Moisten aspect | Slime | Dry | Bright | Cured aspect | Brownish color | Dull | Darker spots | Greenish spots | Wine aroma | garlic aroma | Fermented aroma | Smoke aroma | Cured aroma | Rancid | Sulfur | Mold | Ammoniac/rotten | Butter | Sour/vinegar aroma | Salty taste | Piquant | Sweet taste | Acid taste |
| 502 | 15       | 1            | 60          | 0                         | 2                                  | 0                           | 0                          | 126          | 0              | 0     | 1   | 1      | 1            | 0              | 0    | 0            | 0              | 0          | 0            | 0               | 0           | 0           | 0      | 0      | 1    | 0               | 0      | 1                  | 0           | 0       | 0           | 0          |
| 503 | 16       | 0            | 58          | 1                         | 5                                  | 1                           | 1                          | 126          | 0              | 1     | 0   | 1      | 0            | 0              | 0    | 0            | 0              | 0          | 0            | 0               | 0           | 1           | 0      | 0      | 0    | 0               | 0      | 0                  | 1           | 0       | 0           | 0          |
| 504 | 17       | 1            | 30          | 1                         | 3                                  | 1                           | 1                          | 126          | 0              | 1     | 0   | 0      | 0            | 1              | 0    | 0            | 0              | 0          | 0            | 0               | 0           | 0           | 0      | 0      | 0    | 0               | 0      | 1                  | 0           | 0       | 0           | 0          |
| 505 | 18       | 0            | 59          | 1                         | 5                                  | 1                           | 1                          | 126          | 1              | 0     | 0   | 1      | 0            | 0              | 0    | 0            | 0              | 1          | 1            | 0               | 1           | 0           | 0      | 0      | 0    | 0               | 0      | 0                  | 0           | 0       | 0           | 0          |
| 506 | 19       | 0            | 23          | 1                         | 5                                  | 0                           | 1                          | 126          | 0              | 0     | 1   | 0      | 1            | 0              | 0    | 0            | 0              | 0          | 0            | 0               | 0           | 1           | 0      | 0      | 0    | 0               | 0      | 0                  | 1           | 0       | 0           | 0          |
| 507 | 20       | 0            | 22          | 0                         | 4                                  | 1                           | 1                          | 126          | 0              | 0     | 1   | 0      | 0            | 0              | 1    | 0            | 0              | 1          | 0            | 0               | 0           | 0           | 0      | 0      | 0    | 0               | 0      | 0                  | 0           | 0       | 0           | 1          |
| 508 | 21       | 0            | 23          | 1                         | 2                                  | 0                           | 1                          | 126          | 0              | 0     | 1   | 0      | 0            | 1              | 1    | 0            | 0              | 1          | 0            | 0               | 0           | 0           | 0      | 0      | 0    | 0               | 0      | 0                  | 1           | 0       | 0           | 0          |
| 509 | 22       | 0            | 28          | 1                         | 2                                  | 0                           | 0                          | 126          | 1              | 0     | 0   | 1      | 0            | 0              | 0    | 1            | 0              | 0          | 0            | 0               | 0           | 0           | 1      | 0      | 0    | 0               | 0      | 0                  | 1           | 0       | 0           | 1          |
| 510 | 23       | 1            | 23          | 1                         | 4                                  | 1                           | 1                          | 126          | 1              | 0     | 0   | 0      | 1            | 0              | 0    | 0            | 0              | 0          | 0            | 0               | 0           | 0           | 0      | 0      | 0    | 0               | 0      | 0                  | 1           | 0       | 0           | 0          |
| 511 | 24       | 1            | 39          | 1                         | 5                                  | 1                           | 1                          | 126          | 1              | 1     | 0   | 1      | 0            | 1              | 0    | 1            | 0              | 0          | 0            | 0               | 0           | 0           | 0      | 0      | 0    | 0               | 0      | 0                  | 1           | 0       | 0           | 0          |
| 512 | 25       | 0            | 26          | 1                         | 5                                  | 1                           | 1                          | 126          | 0              | 0     | 1   | 1      | 0            | 0              | 0    | 0            | 0              | 0          | 0            | 0               | 0           | 1           | 0      | 0      | 0    | 0               | 0      | 0                  | 0           | 0       | 0           | 1          |
| 513 | 26       | 0            | 27          | 1                         | 3                                  | 0                           | 0                          | 126          | 0              | 1     | 0   | 1      | 0            | 0              | 0    | 0            | 0              | 1          | 0            | 0               | 0           | 0           | 0      | 0      | 0    | 0               | 1      | 0                  | 0           | 0       | 0           | 0          |
| 514 | 27       | 0            | 36          | 1                         | 1                                  | 0                           | 0                          | 126          | 0              | 0     | 1   | 1      | 0            | 0              | 0    | 0            | 0              | 0          | 0            | 0               | 0           | 1           | 0      | 0      | 0    | 0               | 0      | 0                  | 0           | 0       | 0           | 0          |
| 515 | 28       | 1            | 49          | 1                         | 5                                  | 0                           | 1                          | 126          | 1              | 0     | 0   | 0      | 1            | 0              | 0    | 0            | 0              | 0          | 0            | 0               | 0           | 1           | 0      | 0      | 0    | 0               | 0      | 0                  | 1           | 0       | 0           | 0          |
| 516 | 29       | 1            | 23          | 0                         | 5                                  | 1                           | 1                          | 126          | 0              | 1     | 0   | 1      | 0            | 0              | 0    | 0            | 0              | 1          | 0            | 1               | 0           | 1           | 0      | 0      | 0    | 0               | 0      | 0                  | 0           | 0       | 1           | 0          |
| 517 | 30       | 0            | 46          | 1                         | 5                                  | 1                           | 1                          | 126          | 1              | 0     | 0   | 0      | 1            | 0              | 0    | 0            | 0              | 1          | 1            | 0               | 0           | 0           | 0      | 0      | 0    | 0               | 0      | 0                  | 0           | 0       | 0           | 0          |
| 518 | 31       | 1            | 47          | 1                         | 5                                  | 1                           | 1                          | 126          | 1              | 0     | 0   | 1      | 1            | 0              | 0    | 0            | 0              | 1          | 0            | 1               | 1           | 1           | 0      | 0      | 0    | 0               | 0      | 0                  | 1           | 0       | 0           | 0          |
| 519 | 32       | 0            | 53          | 1                         | 4                                  | 1                           | 1                          | 126          | 0              | 0     | 1   | 0      | 0            | 0              | 0    | 0            | 0              | 1          | 1            | 0               | 0           | 0           | 0      | 0      | 0    | 0               | 0      | 0                  | 1           | 0       | 0           | 1          |
| 520 | 33       | 0            | 48          | 1                         | 4                                  | 1                           | 1                          | 126          | 0              | 1     | 0   | 1      | 1            | 0              | 0    | 0            | 0              | 0          | 1            | 0               | 0           | 0           | 0      | 0      | 0    | 0               | 0      | 0                  | 0           | 0       | 0           | 0          |
| 521 | 34       | 1            | 52          | 1                         | 3                                  | 1                           | 1                          | 126          | 1              | 0     | 0   | 1      | 0            | 0              | 0    | 0            | 0              | 0          | 0            | 0               | 1           | 0           | 0      | 0      | 0    | 0               | 0      | 1                  | 1           | 0       | 0           | 0          |

|     | A        | B            | C           | D                         | E                                  | F                           | G                          | H            | I              | J     | K   | L      | M            | N              | O    | P            | Q              | R          | S            | T               | U           | V           | W      | X      | Y    | Z               | AA     | AB                 | AC          | AD      | AE          | AF         |
|-----|----------|--------------|-------------|---------------------------|------------------------------------|-----------------------------|----------------------------|--------------|----------------|-------|-----|--------|--------------|----------------|------|--------------|----------------|------------|--------------|-----------------|-------------|-------------|--------|--------|------|-----------------|--------|--------------------|-------------|---------|-------------|------------|
| 1   | Consumer | Gender OF 1M | Age (cont.) | Usual consumer 0 no 1 yes | Freshness 1 not fresh 5 very fresh | will to purchase 0 no 1 yes | will to consume 0 no 1 yes | storage time | Moisten aspect | Slime | Dry | Bright | Cured aspect | Brownish color | Dull | Darker spots | Greenish spots | Wine aroma | garlic aroma | Fermented aroma | Smoke aroma | Cured aroma | Rancid | Sulfur | Mold | Ammoniac/rotten | Butter | Sour/vinegar aroma | Salty taste | Piquant | Sweet taste | Acid taste |
| 522 | 35       | 0            | 23          | 1                         | 5                                  | 1                           | 1                          | 126          | 0              | 0     | 1   | 0      | 1            | 0              | 0    | 0            | 0              | 1          | 0            | 0               | 1           | 1           | 0      | 0      | 0    | 0               | 0      | 0                  | 1           | 0       | 0           | 0          |
| 523 | 36       | 0            | 44          | 0                         | 4                                  | 1                           | 1                          | 126          | 0              | 0     | 1   | 0      | 1            | 0              | 1    | 0            | 0              | 0          | 0            | 0               | 0           | 1           | 0      | 0      | 0    | 0               | 0      | 0                  | 0           | 0       | 0           | 0          |
| 524 | 37       | 0            | 26          | 1                         | 3                                  | 1                           | 1                          | 126          | 0              | 0     | 1   | 0      | 1            | 0              | 1    | 0            | 0              | 1          | 1            | 0               | 1           | 1           | 0      | 0      | 0    | 0               | 0      | 0                  | 1           | 1       | 1           | 0          |
| 525 | 38       | 0            | 26          | 1                         | 1                                  | 0                           | 0                          | 126          | 0              | 0     | 1   | 0      | 1            | 0              | 0    | 0            | 0              | 1          | 1            | 0               | 0           | 1           | 0      | 0      | 0    | 0               | 0      | 0                  | 1           | 0       | 0           | 0          |
| 526 | 39       | 0            | 44          | 1                         | 2                                  | 0                           | 0                          | 126          | 0              | 0     | 1   | 0      | 1            | 0              | 1    | 0            | 0              | 0          | 0            | 0               | 1           | 0           | 0      | 0      | 0    | 0               | 0      | 1                  | 0           | 0       | 0           | 1          |
| 527 | 40       | 0            | 21          | 1                         | 2                                  | 0                           | 1                          | 126          | 0              | 0     | 1   | 0      | 1            | 0              | 1    | 0            | 0              | 1          | 0            | 0               | 1           | 1           | 0      | 0      | 0    | 0               | 0      | 1                  | 0           | 0       | 1           | 0          |
| 528 | 41       | 0            | 28          | 1                         | 1                                  | 0                           | 0                          | 126          | 1              | 0     | 0   | 0      | 1            | 0              | 0    | 0            | 0              | 0          | 0            | 0               | 0           | 0           | 0      | 0      | 0    | 0               | 1      | 1                  | 0           | 0       | 0           | 0          |
| 529 | 42       | 0            | 24          | 1                         | 4                                  | 1                           | 1                          | 126          | 0              | 0     | 1   | 1      | 1            | 0              | 0    | 0            | 0              | 0          | 0            | 0               | 0           | 1           | 0      | 0      | 0    | 0               | 0      | 0                  | 0           | 0       | 0           | 0          |
| 530 | 43       | 0            | 23          | 1                         | 4                                  | 1                           | 1                          | 126          | 0              | 0     | 1   | 1      | 1            | 0              | 0    | 0            | 0              | 1          | 0            | 0               | 0           | 0           | 0      | 0      | 0    | 0               | 0      | 0                  | 0           | 0       | 0           | 0          |
| 531 | 44       | 1            | 32          | 1                         | 3                                  | 0                           | 0                          | 126          | 0              | 0     | 1   | 0      | 1            | 0              | 0    | 0            | 0              | 1          | 1            | 0               | 1           | 0           | 0      | 0      | 0    | 0               | 0      | 1                  | 1           | 0       | 0           | 0          |
| 532 | 45       | 1            | 55          | 1                         | 3                                  | 0                           | 0                          | 126          | 0              | 0     | 1   | 0      | 0            | 0              | 1    | 0            | 0              | 1          | 0            | 0               | 0           | 0           | 0      | 0      | 0    | 0               | 0      | 0                  | 0           | 0       | 0           | 1          |
| 533 | 46       | 1            | 54          | 1                         | 4                                  | 1                           | 1                          | 126          | 1              | 0     | 0   | 1      | 0            | 0              | 0    | 1            | 0              | 0          | 0            | 0               | 0           | 1           | 0      | 0      | 0    | 0               | 0      | 0                  | 0           | 0       | 0           | 0          |
| 534 | 47       | 0            | 57          | 0                         | 4                                  | 1                           | 1                          | 126          | 1              | 0     | 0   | 1      | 1            | 0              | 0    | 0            | 0              | 0          | 0            | 1               | 0           | 1           | 0      | 0      | 0    | 0               | 0      | 0                  | 0           | 0       | 1           | 0          |
| 535 | 48       | 1            | 42          | 1                         | 1                                  | 0                           | 0                          | 126          | 0              | 0     | 1   | 1      | 0            | 0              | 0    | 0            | 0              | 0          | 0            | 1               | 0           | 0           | 0      | 0      | 0    | 0               | 0      | 0                  | 0           | 0       | 0           | 0          |
| 536 | 49       | 0            | 26          | 1                         | 3                                  | 1                           | 1                          | 126          | 1              | 1     | 0   | 1      | 1            | 1              | 0    | 0            | 0              | 1          | 0            | 0               | 0           | 1           | 0      | 0      | 0    | 0               | 0      | 0                  | 1           | 0       | 0           | 0          |
| 537 | 50       | 0            | 56          | 1                         | 3                                  | 0                           | 0                          | 126          | 1              | 0     | 0   | 1      | 0            | 0              | 0    | 0            | 0              | 0          | 0            | 0               | 0           | 0           | 0      | 0      | 0    | 0               | 0      | 1                  | 0           | 0       | 0           | 0          |
| 538 | 51       | 1            | 29          | 1                         | 2                                  | 0                           | 0                          | 126          | 0              | 0     | 0   | 1      | 0            | 0              | 0    | 0            | 0              | 0          | 1            | 0               | 0           | 0           | 0      | 0      | 0    | 0               | 0      | 0                  | 0           | 1       | 0           | 0          |
| 539 | 52       | 0            | 26          | 1                         | 4                                  | 1                           | 1                          | 126          | 0              | 0     | 1   | 0      | 1            | 0              | 0    | 0            | 0              | 1          | 1            | 1               | 1           | 1           | 0      | 0      | 0    | 0               | 0      | 1                  | 1           | 0       | 0           | 1          |
| 540 | 53       | 0            | 26          | 0                         | 4                                  | 1                           | 1                          | 126          | 0              | 0     | 1   | 0      | 1            | 0              | 0    | 0            | 0              | 1          | 0            | 0               | 0           | 0           | 0      | 0      | 0    | 0               | 0      | 0                  | 1           | 0       | 0           | 0          |
| 541 | 54       | 0            | 60          | 1                         | 4                                  | 1                           | 1                          | 126          | 0              | 1     | 0   | 1      | 1            | 0              | 0    | 0            | 0              | 0          | 1            | 0               | 1           | 1           | 0      | 0      | 0    | 0               | 0      | 0                  | 1           | 0       | 0           | 0          |

|     | A        | B            | C           | D                         | E                                  | F                           | G                          | H            | I              | J     | K   | L      | M            | N              | O    | P            | Q              | R          | S            | T               | U           | V           | W      | X      | Y    | Z               | AA     | AB                 | AC          | AD      | AE          | AF         |
|-----|----------|--------------|-------------|---------------------------|------------------------------------|-----------------------------|----------------------------|--------------|----------------|-------|-----|--------|--------------|----------------|------|--------------|----------------|------------|--------------|-----------------|-------------|-------------|--------|--------|------|-----------------|--------|--------------------|-------------|---------|-------------|------------|
| 1   | Consumer | Gender OF 1M | Age (cont.) | Usual consumer 0 no 1 yes | Freshness 1 not fresh 5 very fresh | will to purchase 0 no 1 yes | will to consume 0 no 1 yes | storage time | Moisten aspect | Slime | Dry | Bright | Cured aspect | Brownish color | Dull | Darker spots | Greenish spots | Wine aroma | garlic aroma | Fermented aroma | Smoke aroma | Cured aroma | Rancid | Sulfur | Mold | Ammoniac/rotten | Butter | Sour/vinegar aroma | Salty taste | Piquant | Sweet taste | Acid taste |
| 542 | 55       | 0            | 50          | 1                         | 5                                  | 1                           | 1                          | 126          | 0              | 1     | 0   | 1      | 1            | 0              | 0    | 0            | 0              | 1          | 0            | 0               | 0           | 0           | 0      | 0      | 0    | 0               | 0      | 0                  | 1           | 0       | 0           | 0          |
| 543 | 56       | 0            | 54          | 1                         | 4                                  | 1                           | 1                          | 126          | 0              | 1     | 0   | 1      | 0            | 1              | 0    | 0            | 0              | 0          | 0            | 0               | 0           | 1           | 0      | 0      | 0    | 0               | 0      | 0                  | 0           | 0       | 0           | 1          |
| 544 | 57       | 1            | 38          | 1                         | 4                                  | 1                           | 1                          | 126          | 0              | 0     | 1   | 0      | 1            | 0              | 0    | 0            | 0              | 0          | 0            | 0               | 0           | 0           | 0      | 0      | 0    | 0               | 1      | 0                  | 0           | 0       | 0           | 1          |
| 545 | 58       | 0            | 24          | 1                         | 3                                  | 1                           | 1                          | 126          | 1              | 0     | 0   | 1      | 0            | 0              | 0    | 0            | 0              | 0          | 1            | 0               | 0           | 0           | 0      | 0      | 0    | 0               | 0      | 0                  | 0           | 0       | 0           | 0          |
| 546 | 59       | 0            | 23          | 1                         | 4                                  | 1                           | 1                          | 126          | 0              | 0     | 1   | 0      | 0            | 1              | 0    | 0            | 0              | 0          | 0            | 0               | 1           | 0           | 0      | 0      | 0    | 0               | 0      | 0                  | 0           | 0       | 0           | 0          |
| 547 | 60       | 1            | 22          | 1                         | 5                                  | 0                           | 0                          | 126          | 0              | 0     | 1   | 0      | 1            | 0              | 0    | 0            | 0              | 1          | 0            | 0               | 0           | 0           | 0      | 0      | 0    | 0               | 0      | 0                  | 1           | 0       | 0           | 0          |
| 548 | 61       | 1            | 35          | 1                         | 2                                  | 1                           | 1                          | 126          | 0              | 0     | 1   | 0      | 0            | 0              | 1    | 0            | 0              | 0          | 0            | 0               | 0           | 0           | 1      | 0      | 0    | 0               | 0      | 0                  | 0           | 0       | 0           | 0          |
| 549 | 62       | 1            | 58          | 1                         | 2                                  | 0                           | 0                          | 126          | 0              | 0     | 1   | 0      | 0            | 0              | 0    | 1            | 0              | 0          | 0            | 0               | 0           | 0           | 0      | 0      | 0    | 0               | 0      | 0                  | 1           | 0       | 0           | 1          |
| 550 | 63       | 0            | 26          | 1                         | 3                                  | 1                           | 1                          | 126          | 0              | 0     | 1   | 0      | 1            | 0              | 0    | 0            | 0              | 0          | 1            | 0               | 0           | 0           | 0      | 0      | 0    | 0               | 0      | 0                  | 1           | 0       | 0           | 0          |
| 551 | 64       | 0            | 56          | 1                         | 3                                  | 1                           | 1                          | 126          | 0              | 0     | 1   | 0      | 0            | 0              | 1    | 0            | 0              | 0          | 1            | 0               | 1           | 0           | 0      | 0      | 0    | 0               | 0      | 0                  | 1           | 0       | 0           | 1          |
| 552 | 65       | 0            | 33          | 1                         | 4                                  | 1                           | 1                          | 126          | 1              | 0     | 0   | 1      | 1            | 0              | 0    | 0            | 0              | 1          | 1            | 0               | 0           | 1           | 0      | 0      | 0    | 0               | 0      | 0                  | 1           | 0       | 0           | 0          |
| 553 | 66       | 0            | 54          | 1                         | 4                                  | 1                           | 1                          | 126          | 0              | 0     | 1   | 0      | 0            | 0              | 1    | 0            | 0              | 1          | 1            | 0               | 1           | 0           | 0      | 0      | 0    | 0               | 0      | 0                  | 1           | 0       | 0           | 0          |
| 554 | 67       | 1            | 25          | 1                         | 4                                  | 1                           | 1                          | 126          | 0              | 0     | 1   | 0      | 0            | 0              | 0    | 1            | 0              | 0          | 0            | 0               | 1           | 0           | 0      | 0      | 0    | 0               | 0      | 0                  | 0           | 0       | 0           | 1          |
| 555 | 68       | 1            | 25          | 1                         | 5                                  | 1                           | 1                          | 126          | 0              | 0     | 1   | 1      | 1            | 0              | 0    | 0            | 0              | 1          | 1            | 0               | 0           | 1           | 0      | 0      | 0    | 0               | 0      | 0                  | 1           | 0       | 0           | 1          |
| 556 | 69       | 1            | 29          | 1                         | 5                                  | 1                           | 1                          | 126          | 0              | 0     | 1   | 1      | 1            | 0              | 0    | 0            | 0              | 1          | 1            | 0               | 0           | 0           | 0      | 0      | 0    | 0               | 0      | 0                  | 1           | 0       | 0           | 0          |
| 557 | 70       | 1            | 56          | 1                         | 3                                  | 1                           | 1                          | 126          | 0              | 0     | 1   | 0      | 1            | 0              | 0    | 0            | 0              | 0          | 0            | 0               | 1           | 0           | 0      | 0      | 0    | 0               | 0      | 0                  | 0           | 1       | 0           | 0          |
| 558 | 71       | 1            | 50          | 1                         | 5                                  | 1                           | 1                          | 126          | 1              | 0     | 0   | 0      | 1            | 0              | 0    | 0            | 0              | 1          | 0            | 0               | 0           | 0           | 0      | 0      | 0    | 0               | 0      | 1                  | 1           | 0       | 0           | 0          |
| 559 | 72       | 0            | 57          | 1                         | 4                                  | 0                           | 0                          | 126          | 0              | 1     | 0   | 0      | 1            | 0              | 1    | 1            | 0              | 1          | 0            | 0               | 0           | 1           | 0      | 0      | 0    | 0               | 0      | 1                  | 0           | 0       | 0           | 0          |
| 560 | 73       | 1            | 22          | 1                         | 1                                  | 0                           | 1                          | 126          | 0              | 0     | 1   | 0      | 1            | 0              | 1    | 1            | 0              | 1          | 1            | 0               | 0           | 0           | 0      | 0      | 0    | 0               | 0      | 0                  | 1           | 0       | 0           | 0          |
| 561 | 74       | 1            | 55          | 1                         | 4                                  | 0                           | 1                          | 126          | 0              | 0     | 1   | 0      | 1            | 0              | 1    | 0            | 0              | 1          | 1            | 0               | 1           | 1           | 0      | 0      | 0    | 0               | 0      | 0                  | 1           | 1       | 0           | 0          |

|     | A        | B            | C           | D                         | E                                  | F                           | G                          | H            | I              | J     | K   | L      | M            | N              | O    | P            | Q              | R          | S            | T               | U           | V           | W      | X      | Y    | Z               | AA     | AB                 | AC         | AD      | AE          | AF         |
|-----|----------|--------------|-------------|---------------------------|------------------------------------|-----------------------------|----------------------------|--------------|----------------|-------|-----|--------|--------------|----------------|------|--------------|----------------|------------|--------------|-----------------|-------------|-------------|--------|--------|------|-----------------|--------|--------------------|------------|---------|-------------|------------|
| 1   | Consumer | Gender OF 1M | Age (cont.) | Usual consumer 0 no 1 yes | Freshness 1 not fresh 5 very fresh | will to purchase 0 no 1 yes | will to consume 0 no 1 yes | storage time | Moisten aspect | Slime | Dry | Bright | Cured aspect | Brownish color | Dull | Darker spots | Greenish spots | Wine aroma | garlic aroma | Fermented aroma | Smoke aroma | Cured aroma | Rancid | Sulfur | Mold | Ammoniac/rotten | Butter | Sour/vinegar aroma | Salty tase | Piquant | Sweet taste | Acid taste |
| 562 | 75       | 0            | 26          | 1                         | 3                                  | 1                           | 1                          | 126          | 1              | 0     | 0   | 1      | 1            | 0              | 0    | 0            | 0              | 0          | 0            | 0               | 0           | 1           | 0      | 0      | 0    | 0               | 0      | 1                  | 1          | 0       | 0           | 0          |
| 563 | 76       | 0            | 53          | 1                         | 3                                  | 1                           | 1                          | 126          | 0              | 0     | 0   | 0      | 1            | 0              | 0    | 0            | 0              | 0          | 0            | 0               | 1           | 0           | 0      | 0      | 0    | 0               | 0      | 0                  | 0          | 1       | 0           | 0          |
| 564 | 77       | 1            | 53          | 1                         | 4                                  | 1                           | 1                          | 126          | 0              | 0     | 1   | 0      | 1            | 0              | 0    | 0            | 0              | 1          | 0            | 0               | 0           | 1           | 0      | 0      | 0    | 0               | 0      | 0                  | 1          | 1       | 0           | 0          |
| 565 | 78       | 1            | 58          | 1                         | 3                                  | 0                           | 1                          | 126          | 1              | 0     | 0   | 0      | 0            | 1              | 0    | 0            | 0              | 1          | 0            | 0               | 1           | 0           | 0      | 0      | 0    | 0               | 0      | 0                  | 1          | 0       | 0           | 0          |
| 566 | 79       | 0            | 60          | 1                         | 4                                  | 1                           | 1                          | 126          | 0              | 1     | 0   | 0      | 0            | 0              | 1    | 0            | 0              | 1          | 0            | 0               | 0           | 0           | 0      | 0      | 0    | 0               | 0      | 0                  | 1          | 0       | 0           | 0          |
| 567 | 80       | 1            | 26          | 1                         | 3                                  | 0                           | 1                          | 126          | 0              | 0     | 1   | 0      | 1            | 0              | 0    | 0            | 0              | 0          | 0            | 0               | 0           | 0           | 0      | 0      | 0    | 0               | 0      | 0                  | 1          | 0       | 0           | 0          |
| 568 | 81       | 0            | 27          | 1                         | 5                                  | 1                           | 1                          | 126          | 0              | 0     | 1   | 0      | 1            | 0              | 0    | 0            | 0              | 1          | 0            | 0               | 0           | 1           | 0      | 0      | 0    | 0               | 0      | 0                  | 1          | 0       | 0           | 0          |
